# Supplementary material for: Discovery and Functional Annotation of Quantitative Trait Loci Affecting Resistance to Sea Lice in Atlantic Salmon
Source: Front Genet. 2019 Feb 8;10:56. doi: 10.3389/fgene.2019.00056 (PMC6375901; doi:10.3389/fgene.2019.00056)
Supplement: TABLE S2 — Phenotypes of the challenged animals. [file Table_2.xlsx]

## Sheet: Supplementary file 4 - phenotyp
Supplementary Table 2. Phenotypes of the challenged animals
ID	Initial weight	Initial length	End of challenge weight	End of challenge length	Caligus number	Caligus density	Sex	tank
FM2014017499	97	20	106	23	39	0.613754	Male	M2
FM2014010304	86	19.5	123	23	14	-0.330508	Male	M2
FM2014030490	90	19.5	106	22	23	0.135621	Female	M2
FM2014043511	112	20.5	130	23	32	0.32007	Male	M2
FM2014040701	124	21.5	194	27	61	0.897353	Male	M2
FM2014041850	166	24	239	29	27	-0.112155	Male	M2
FM2014019654	87	19.5	124	23	40	0.711607	Female	M2
FM2014017433	113	21.5	189	27	25	0.0672839	Male	M2
FM2014011982	87	19.5	125	23	24	0.200782	Female	M2
FM2014042364	135	22.5	179	26	22	-0.179141	Female	M2
FM2014047319	99	20	115	23	28	0.268791	Male	M2
FM2014027793	81	19	127	23.5	20	0.0660995	Male	M2
FM2014020841	156	23.5	165	25.5	77	0.977235	Male	M2
FM2014048039	90	19.5	104	23.5	23	0.135621	Male	M2
FM2014032413	95	20	129	24	21	0.00860451	Female	M2
FM2014014108	87	19	111	22	49	0.914548	Female	M2
FM2014041122	101	21	143	25	53	0.893545	Female	M2
FM2014016293	113	20.5	129	23.5	30	0.249606	Female	M2
FM2014037226	188	26.5	272	28.5	40	0.197918	Male	M2
FM2014016601	103	21	148	25	19	-0.14538	Male	M2
FM2014026307	80	19	129	23	17	-0.0881377	Female	M2
FM2014041105	156	23.5	135	25	49	0.52525	Male	M2
FM2014016218	90	20	101	22.5	79	1.36957	Female	M2
FM2014015902	177	24.5	211	27.5	28	-0.118562	Male	M2
FM2014046159	110	21	173	26	32	0.332082	Male	M2
FM2014027520	92	19.5	119	22.5	27	0.281311	Male	M2
FM2014049918	101	20.5	139	24.5	30	0.32445	Male	M2
FM2014044033	112	20.5	143	24	34	0.380695	Male	M2
FM2014008666	116	22	170	25	25	0.0498157	Female	M2
FM2014025069	132	22.7	188	26.5	28	0.0770032	Female	M2
FM2014011002	185	24.2	177	26.5	39	0.183324	Female	M2
FM2014009658	101	20.5	117	22.5	37	0.534171	Male	M2
FM2014010478	92	20.1	129	24	35	0.540822	Male	M2
FM2014010693	124	22	150	25	26	0.0445755	Female	M2
FM2014039475	275	29	266	31	67	0.460179	Male	M2
FM2014007913	186	25.3	386	32	35	0.0715169	Male	M2
FM2014044660	109	20.5	149	24.5	22	-0.0365228	Male	M2
FM2014017864	109	21	160	25	36	0.455954	Female	M2
FM2014043570	89	19	110	21.5	37	0.618494	Male	M2
FM2014009713	85	20	116	23	15	-0.253717	Male	M2
FM2014017112	121	23	159	25.5	28	0.135011	Male	M2
FM2014034958	89	19.5	131	23.5	47	0.857723	Male	M2
FM2014030311	110	20	144	23.5	25	0.0852222	Male	M2
FM2014013803	225	27	305	31.5	38	0.0268526	Male	M2
FM2014032880	157	24	268	30	35	0.184518	Male	M2
FM2014045727	90	20	126	23.5	30	0.401324	Male	M2
FM2014045337	191	25	205	26.5	53	0.468776	Female	M2
FM2014032486	88	19.5	84	21	23	0.150603	Male	M2
FM2014039736	89	20	132	24	21	0.0520982	Male	M2
FM2014041852	91	19.5	116	22.5	43	0.75396	Female	M2
FM2014019338	136	23	184	27	57	0.767948	Female	M2
FM2014026256	82	19.5	117	23	31	0.496174	Female	M2
FM2014048901	101	20	84	21	21	-0.0322246	Female	M2
FM2014026762	95	20	127	23	29	0.331378	Female	M2
FM2014017229	102	21	140	25	25	0.135561	Male	M2
FM2014024107	92	20	86	21	14	-0.375468	Male	M2
FM2014017829	115	21	180	26	24	0.0147657	Male	M2
FM2014022407	90	20	138	24.5	31	0.434114	Male	M2
FM2014047396	143	23	142	24.5	32	0.157173	Male	M2
FM2014041893	192	24.5	244	28.5	40	0.183883	Male	M2
FM2014029887	81	19	147	24	41	0.783939	Male	M2
FM2014018911	156	23	199	27	32	0.0991652	Male	M2
FM2014027645	86	19.5	146	24.5	33	0.526943	Male	M2
FM2014025431	137	23	129	24.5	27	0.0158496	Male	M2
FM2014028776	148	23	152	25	42	0.406195	Male	M2
FM2014018364	119	21.5	166	25.5	37	0.424836	Male	M2
FM2014019162	90	19.5	135	23	30	0.401324	Male	M2
FM2014033367	149	22.5	175	25	40	0.352915	Male	M2
FM2014011361	218	26	276	30	28	-0.257459	Female	M2
FM2014035996	110	21	144	24.5	19	-0.189215	Male	M2
FM2014028704	138	22.5	184	27	44	0.499354	Male	M2
FM2014038668	227	26.5	272	30.5	70	0.631862	Male	M2
FM2014010888	213	26	290	30	71	0.688485	Male	M2
FM2014046995	176	25	207	27	37	0.163929	Female	M2
FM2014014648	84	20	153	25	21	0.0906446	Male	M2
FM2014041042	112	22	174	26	23	-0.0101717	Female	M2
FM2014043550	152	23	182	27	40	0.339626	Male	M2
FM2014027448	107	22	137	23.5	19	-0.17078	Male	M2
FM2014026223	111	21	184	26.5	26	0.11841	Male	M2
FM2014022030	194	25.5	188	28	53	0.458386	Male	M2
FM2014044235	82	18.5	108	21.5	28	0.394392	Female	M2
FM2014041490	113	21	148	24.5	29	0.215704	Male	M2
FM2014020061	106	20.5	113	23	23	0.0265348	Male	M2
FM2014030038	105	20.5	122	23	24	0.0754136	Male	M2
FM2014015080	125	22	113	23	22	-0.127833	Female	M2
FM2014018873	97	20.5	149	24	18	-0.159436	Female	M2
FM2014027450	86	19	108	22	19	-0.0251259	Male	M2
FM2014015171	91	20	135	24	32	0.458496	Male	M2
FM2014024485	82	19	112	22	26	0.320284	Female	M2
FM2014009687	108	21	145	24.5	23	0.0140734	Female	M2
FM2014008975	260	27.5	312	31	97	0.86759	Male	M2
FM2014032520	86	19	127	23	25	0.249311	Female	M2
FM2014041842	172	24	172	26	34	0.0946975	Female	M2
FM2014030785	105	20.5	181	26	19	-0.158201	Male	M2
FM2014016237	88	19	110	22	29	0.382405	Male	M2
FM2014036069	110	20	123	22	20	-0.137921	Male	M2
FM2014043105	139	23	134	24.5	26	-0.0315528	Female	M2
FM2014043986	133	22	132	24	21	-0.21571	Male	M2
FM2014016849	139	22	149	24	26	-0.0315528	Male	M2
FM2014012859	227	27	259	30	23	-0.481139	Male	M2
FM2014040692	143	23	225	28	47	0.541585	Female	M2
FM2014019314	87	19	137	24	18	-0.0869003	Male	M2
FM2014046862	118	21.5	193	26.5	33	0.316051	Male	M2
FM2014030471	81	20	81	21	16	-0.157044	Female	M2
FM2014032160	187	25.5	221	29	47	0.362742	Male	M2
FM2014036808	109	22	146	25	22	-0.0365228	Male	M2
FM2014013014	111	22	163	26	15	-0.431637	Female	M2
FM2014019602	124	21.5	165	25	26	0.0445755	Male	M2
FM2014049153	87	19.5	106	22	20	0.0184602	Male	M2
FM2014035211	85	19.5	139	24	30	0.43943	Male	M2
FM2014031742	197	26.5	269	30	22	-0.431093	Female	M2
FM2014031138	158	23.5	202	26.5	37	0.235855	Male	M2
FM2014024084	90	19	117	22.5	19	-0.0554341	Female	M2
FM2014040553	167	24	213	28	35	0.143352	Male	M2
FM2014048562	107	21	123	23.5	15	-0.407169	Male	M2
FM2014031775	103	21	145	23.5	33	0.406688	Male	M2
FM2014029998	173	24.5	169	26	34	0.0908328	Female	M2
FM2014038491	98	20	135	24	29	0.310651	Female	M2
FM2014036888	91	19.5	119	23	36	0.576279	Male	M2
FM2014036214	112	21.5	125	24	24	0.0323879	Female	M2
FM2014012036	149	23	195	26.5	27	-0.0401273	Male	M2
FM2014013402	241	27	323	31	29	-0.289235	Male	M2
FM2014010132	177	24	278	31	71	0.811913	Male	M2
FM2014009906	99	20	139	24	39	0.600148	Male	M2
FM2014010117	187	25	364	31	35	0.0679423	Female	M2
FM2014015169	89	19	122	22	27	0.303413	Male	M2
FM2014028410	96	20	134	23	39	0.620663	Male	M2
FM2014045670	109	20.5	118	22.5	29	0.239731	Female	M2
FM2014024643	134	22	159	25.5	33	0.231281	Male	M2
FM2014042246	129	22.5	167	26	24	-0.0618211	Male	M2
FM2014010301	86	19.5	132	24	30	0.431633	Male	M2
FM2014025894	86	19.5	111	23	36	0.613954	Male	M2
FM2014034498	86	19.5	102	22	13	-0.404616	Female	M2
FM2014032592	89	19.5	119	22	31	0.441563	Male	M2
FM2014033959	99	19.5	181	25.5	33	0.433094	Female	M2
FM2014033237	242	27	222	29	56	0.36606	Female	M2
FM2014011959	148	24.2	157	26	24	-0.153421	Male	M2
FM2014045064	97	20	134	23.5	29	0.317489	Female	M2
FM2014021445	118	21	148	25	19	-0.236017	Female	M2
FM2014008642	353	31	514	37	53	0.0593132	Male	M2
FM2014025434	160	23	173	25	31	0.050538	Female	M2
FM2014030521	215	26	239	29	32	-0.114689	Female	M2
FM2014029643	103	20.5	154	24.5	26	0.168277	Male	M2
FM2014010510	103	21	122	23	34	0.436541	Male	M2
FM2014025979	89	19.5	111	22.5	22	0.0986182	Male	M2
FM2014040929	104	21.5	148	25.5	25	0.122615	Male	M2
FM2014034131	183	24	151	25	32	-0.00725487	Female	M2
FM2014012330	143	23	207	27.5	30	0.0926343	Male	M2
FM2014027100	86	19	110	22.5	22	0.121478	Male	M2
FM2014030002	156	24.5	175	26	21	-0.322048	Female	M2
FM2014022483	250	27	288	31	47	0.169174	Female	M2
FM2014033052	123	22	167	26	11	-0.810228	Female	M2
FM2014015167	108	21	143	24.5	44	0.662769	Male	M2
FM2014030290	87	19.5	132	24	21	0.0672504	Female	M2
FM2014028482	92	20	138	24.5	22	0.0765167	Female	M2
FM2014012412	156	23	153	26	17	-0.533357	Female	M2
FM2014011548	93	20	94	21	27	0.274104	Male	M2
FM2014020743	157	23	188	26.5	32	0.0949054	Male	M2
FM2014027210	97	19.5	133	23	9	-0.852583	Male	M2
FM2014023348	144	22	178	26	20	-0.317477	Male	M2
FM2014035146	99	20	117	23	18	-0.173041	Male	M2
FM2014017963	97	20	154	24	36	0.533712	Female	M2
FM2014011963	93	20	145	24.5	34	0.504628	Male	M2
FM2014013801	91	19.5	126	23	53	0.963052	Female	M2
FM2014008996	184	24.5	251	28.5	29	-0.109328	Male	M2
FM2014036110	98	21	89	21.5	25	0.162231	Male	M2
FM2014042339	105	20	164	25	25	0.116236	Female	M2
FM2014034589	95	19.5	139	23.5	23	0.0995763	Male	M2
FM2014031801	149	28.5	209	27	27	-0.0401273	Male	M2
FM2014041410	80	19	134	24	21	0.123171	Male	M2
FM2014023376	105	20	143	23.5	27	0.193197	Male	M2
FM2014040738	90	19.5	122	23.5	44	0.784317	Female	M2
FM2014013768	238	28	296	31	26	-0.390084	Female	M2
FM2014014129	205	26	216	28	57	0.494378	Male	M2
FM2014020333	82	19	108	22.5	10	-0.635228	Male	M2
FM2014028441	103	21	136	24	29	0.277477	Female	M2
FM2014019256	91	19.5	116	22.5	27	0.288597	Male	M2
FM2014032878	88	20	124	23	20	0.0108411	Male	M2
FM2014038224	142	22	178	25.5	36	0.279634	Female	M2
FM2014043546	94	20.5	124	23	28	0.303341	Male	M2
FM2014013149	129	23	176	26.5	15	-0.531825	Male	M2
FM2014038040	142	23	177	25	17	-0.470671	Male	M2
FM2014014707	81	20	89	21	28	0.402572	Male	M2
FM2014034431	130	21.5	181	25	16	-0.472434	Female	M2
FM2014022122	108	21.3	138	24	33	0.375087	Female	M2
FM2014011789	280	29	372	34	48	0.114675	Female	M2
FM2014010211	139	22	198	27	23	-0.154155	Female	M2
FM2014027988	81	19	89	21	24	0.248421	Female	M2
FM2014035173	106	21	149	24.5	10	-0.806374	Male	M2
FM2014041805	87	19.5	118	23	31	0.456715	Male	M2
FM2014039717	194	25	237	29	54	0.477079	Male	M2
FM2014010905	130	22.7	177	26	53	0.725269	Male	M2
FM2014026296	103	21	153	24.5	37	0.521099	Male	M2
FM2014023370	99	21	88	22	33	0.433094	Male	M2
FM2014007882	130	22.1	111	23	30	0.156174	Male	M2
FM2014015366	174	24	172	26	33	0.0571374	Female	M2
FM2014026207	110	21	175	25.5	38	0.503933	Female	M2
FM2014024505	122	21.5	102	23	29	0.164615	Female	M2
FM2014031306	149	22	198	25	17	-0.502751	Male	M2
FM2014020469	103	21	145	25	32	0.375917	Male	M2
FM2014044055	104	20.5	142	24.5	37	0.514657	Male	M2
FM2014023477	175	24	254	29	51	0.488635	Female	M2
FM2014043518	105	21	149	23.5	34	0.42372	Female	M2
FM2014032150	110	21	147	24	28	0.198551	Female	M2
FM2014038095	94	19.5	131	23	34	0.497497	Male	M2
FM2014026705	93	20	125	24	23	0.113761	Male	M2
FM2014024057	109	20.5	181	26	38	0.510021	Male	M2
FM2014040623	108	21	107	22.5	37	0.489497	Male	M2
FM2014019539	101	20	105	22.5	31	0.35724	Male	M2
FM2014025030	105	20.4	135	23	20	-0.106908	Male	M2
FM2014040664	163	24	196	27	40	0.293046	Female	M2
FM2014026163	85	19.5	111	23	36	0.621751	Female	M2
FM2014024938	110	20.5	152	24.5	17	-0.30044	Male	M2
FM2014035385	81	18.5	135	23	26	0.328464	Male	M2
FM2014040259	97	20.5	131	24	20	-0.054075	Female	M2
FM2014029651	121	22	123	23.5	49	0.694627	Female	M2
FM2014048961	125	21.5	186	25.9	32	0.24686	Male	M2
FM2014037867	104	20.5	143	24	21	-0.0517382	Male	M2
FM2014025125	88	19.4	95	21.5	23	0.150603	Male	M2
FM2014014320	116	21	151	24.9	40	0.519819	Male	M2
FM2014021159	101	20	142	23.8	35	0.478601	Male	M2
FM2014008489	91	20	98	22	35	0.548108	Male	M2
FM2014011953	200	25.5	194	27.7	32	-0.0664757	Female	M2
FM2014046134	100	20.5	150	24.5	29	0.297182	Male	M2
FM2014041007	161	25	215	27	39	0.275959	Male	M2
FM2014036439	141	23	156	25	26	-0.0410767	Female	M2
FM2014032064	160	23.5	183	26.2	34	0.142911	Male	M2
FM2014017237	104	21	130	23.5	26	0.161836	Male	M2
FM2014048532	105	21.5	105	23.3	37	0.508278	Male	M2
FM2014017133	95	20	159	24.8	31	0.398069	Male	M2
FM2014014291	112	21.5	155	25.7	38	0.49192	Male	M2
FM2014024055	82	19	101	21.5	20	0.0579194	Female	M2
FM2014047691	88	19.5	111	22.2	35	0.570457	Female	M2
FM2014024700	116	22	163	25.4	30	0.232137	Male	M2
FM2014031678	87	19	108	21.9	20	0.0184602	Male	M2
FM2014045529	93	19	112	22.5	57	1.02132	Female	M2
FM2014044818	116	21.5	110	23	31	0.264927	Female	M2
FM2014045992	97	21	93	22.7	23	0.0856869	Male	M2
FM2014046124	109	21	105	22.7	31	0.306422	Male	M2
FM2014039482	137	24	171	26.2	49	0.611833	Male	M2
FM2014042990	85	19.5	133	23.8	28	0.370437	Male	M2
FM2014018650	105	21	146	24	29	0.264656	Female	M2
FM2014023639	129	21.5	143	23.8	45	0.566788	Male	M2
FM2014029090	90	19.5	116	23	51	0.931953	Male	M2
FM2014024631	86	19	113	22.3	29	0.397731	Male	M2
FM2014021339	81	19	110	22.5	17	-0.0964194	Male	M2
FM2014022881	87	19.5	94	21.5	33	0.519235	Male	M2
FM2014020561	116	21	168	25.5	31	0.264927	Male	M2
FM2014038055	185	24	267	28	51	0.451588	Male	M2
FM2014035255	170	24	189	27	32	0.0418703	Male	M2
FM2014009301	227	27	220	28.2	20	-0.620901	Female	M2
FM2014016423	84	19	99	21	26	0.304219	Female	M2
FM2014045118	131	22	125	23.5	39	0.41343	Male	M2
FM2014017941	109	21	166	25.4	38	0.510021	Male	M2
FM2014046332	86	19	78	21	22	0.121478	Female	M2
FM2014037269	96	20	132	23.5	34	0.483462	Female	M2
FM2014042800	116	21	191	26	36	0.414459	Male	M2
FM2014025113	109	21	117	22.5	24	0.0504886	Male	M2
FM2014029610	93	20	106	22.1	23	0.113761	Female	M2
FM2014041011	173	24	218	27	36	0.147991	Female	M2
FM2014010880	102	21	146	24	22	0.00772724	Female	M2
FM2014049902	95	20.5	132	23.5	49	0.855902	Male	M2
FM2014021787	117	22	162	25	26	0.0833139	Male	M2
FM2014029219	108	20.5	162	24.5	26	0.136676	Male	M2
FM2014036955	85	20	98	22	15	-0.253717	Female	M2
FM2014028626	159	23.5	164	25.5	39	0.284292	Female	M2
FM2014015962	80	19	110	21.5	24	0.256703	Female	M2
FM2014035238	101	20.5	161	25	18	-0.186375	Male	M2
FM2014044816	100	20.5	138	23.5	22	0.020929	Female	M2
FM2014012829	91	19.5	119	22	24	0.170814	Female	M2
FM2014023002	142	22.5	190	26.5	24	-0.125831	Female	M2
FM2014015400	111	22	142	23.5	43	0.621513	Female	M2
FM2014048547	239	28	285	30.5	59	0.426562	Male	M2
FM2014036372	171	23.5	190	26	31	0.0062115	Female	M2
FM2014025391	160	23.5	241	28	36	0.20007	Female	M2
FM2014041538	106	21	158	25.5	43	0.652241	Female	M2
FM2014039844	80	18.5	119	21.7	26	0.336745	Female	M2
FM2014034407	89	19.5	110	21.4	30	0.408773	Male	M2
FM2014014590	81	18.5	109	22	48	0.941568	Female	M2
FM2014020004	109	21	111	22.5	58	0.932878	Male	M2
FM2014010172	96	20.5	136	23.5	22	0.0481437	Female	M2
FM2014030801	83	19.5	118	22.5	31	0.488093	Male	M2
FM2014015552	139	22	123	22.9	42	0.44802	Male	M2
FM2014028771	116	21	178	25	31	0.264927	Female	M2
FM2014032159	81	18.5	107	21.5	30	0.471565	Male	M2
FM2014040161	80	19	110	22.5	37	0.689567	Female	M2
FM2014037362	116	21	147	24	36	0.414459	Female	M2
FM2014015459	105	20.5	142	23	35	0.452708	Male	M2
FM2014047155	80	19.5	108	22.3	27	0.374486	Female	M2
FM2014018793	171	24	196	26.9	34	0.0985848	Male	M2
FM2014014326	102	20.5	115	22.8	27	0.212522	Male	M2
FM2014041326	102	20	120	23	19	-0.138876	Female	M2
FM2014020888	192	25	288	29	36	0.078522	Male	M2
FM2014039764	97	19.5	121	23	27	0.24603	Female	M2
FM2014022000	135	22	150	24.5	34	0.256177	Male	M2
FM2014027123	111	20.5	100	21	35	0.415661	Male	M2
FM2014039787	108	21	143	23	51	0.810405	Female	M2
FM2014025835	80	19	98	21.5	23	0.214143	Female	M2
FM2014007883	85	19.6	125	23.5	27	0.334069	Male	M2
FM2014047003	85	19.5	126	23	28	0.370437	Female	M2
FM2014023774	92	20	150	24	28	0.317679	Male	M2
FM2014039360	99	20.5	113	22.5	24	0.114641	Male	M2
FM2014013488	188	25	206	27.7	40	0.197918	Male	M2
FM2014036954	157	24.5	231	28	36	0.212688	Male	M2
FM2014027020	96	19	80	20.5	19	-0.0984598	Male	M2
FM2014011619	93	20	134	23.5	63	1.1214	Female	M2
FM2014042667	120	21.5	180	26	22	-0.100619	Male	M2
FM2014046883	149	23.5	136	25	27	-0.0401273	Female	M2
FM2014038494	122	22	194	27	21	-0.158158	Male	M2
FM2014039107	178	25.5	246	29.3	64	0.704361	Male	M2
FM2014021635	81	19	110	22.4	35	0.625715	Male	M2
FM2014014961	146	23.5	192	27.3	33	0.174103	Female	M2
FM2014033782	81	19	106	22	23	0.205861	Male	M2
FM2014042400	82	19.5	97	21.5	30	0.463385	Male	M2
FM2014046333	159	24	228	28	43	0.381931	Female	M2
FM2014048083	125	22.5	192	27.5	24	-0.040822	Female	M2
FM2014017430	84	19	140	23.5	20	0.0418544	Male	M2
FM2014047727	175	24.5	235	28.8	37	0.167727	Male	M2
FM2014017944	81	19	126	23	20	0.0660995	Male	M2
FM2014046131	164	23.5	239	28.5	41	0.313661	Female	M2
FM2014038577	101	20.5	126	24	28	0.255457	Male	M2
FM2014010721	130	22	164	26	37	0.365895	Male	M2
FM2014013797	118	21.7	133	24	34	0.345904	Female	M2
FM2014018780	82	19.5	88	21.5	40	0.751067	Male	M2
FM2014012845	250	27.5	298	30	48	0.190227	Female	M2
FM2014037369	110	21	164	25	18	-0.243282	Male	M2
FM2014044763	120	21.5	146	24.5	25	0.0272147	Female	M2
FM2014031569	88	19.5	128	23	26	0.273205	Male	M2
FM2014026740	122	21.5	168	25.5	29	0.164615	Male	M2
FM2014033947	86	19	126	22	62	1.15757	Female	M2
FM2014033034	100	21	135	23	44	0.714076	Male	M2
FM2014030350	153	23	172	25	44	0.430564	Female	M2
FM2014036115	148	23	179	25.5	32	0.134261	Male	M2
FM2014021147	201	25	311	29.8	16	-0.762948	Male	M2
FM2014010578	102	20.5	146	24.5	34	0.443045	Male	M2
FM2014022534	130	22	188	26	29	0.122273	Female	M2
FM2014013567	142	22.5	203	26.5	15	-0.595835	Male	M2
FM2014013909	98	20	86	22	36	0.526874	Male	M2
FM2014008179	106	20	130	24.2	28	0.223245	Male	M2
FM2014033767	110	21	103	22	20	-0.137921	Female	M2
FM2014011596	167	23.5	214	27.4	31	0.0219913	Male	M2
FM2014030030	112	21.5	157	25.3	32	0.32007	Female	M2
FM2014048520	94	20.5	122	23.5	28	0.303341	Female	M2
FM2014020571	140	23	190	27	25	-0.0755525	Female	M2
FM2014035651	85	19	106	21.5	16	-0.189179	Male	M2
FM2014042659	185	24.5	270	28.9	29	-0.112941	Female	M2
FM2014043631	100	21	137	24	28	0.262091	Female	M2
FM2014029642	124	22	194	27.5	23	-0.0780268	Female	M2
FM2014045900	159	23	193	26.5	17	-0.546056	Male	M2
FM2014014266	91	19.5	117	23	20	-0.0115074	Female	M2
FM2014046461	107	21	105	23	17	-0.282006	Male	M2
FM2014035629	98	20.5	127	23.5	43	0.704555	Male	M2
FM2014049356	136	23	139	24.5	18	-0.384731	Male	M2
FM2014009091	137	22.5	156	25.5	27	0.0158496	Male	M2
FM2014016992	116	22	125	24.5	39	0.494502	Male	M2
FM2014022232	87	19.5	120	23	42	0.760398	Male	M2
FM2014021191	174	23.5	218	27	22	-0.348328	Male	M2
FM2014039841	80	19	107	22	31	0.512636	Female	M2
FM2014023299	187	25	221	28	27	-0.191569	Male	M2
FM2014027636	108	21	138	24.3	18	-0.231049	Female	M2
FM2014021693	106	20.5	120	23	7	-1.16305	Male	M2
FM2014048549	136	22	174	25.7	37	0.335815	Female	M2
FM2014009708	283	28.5	353	32.5	40	-0.0747518	Female	M2
FM2014035647	100	20	129	23	25	0.148762	Female	M2
FM2014033730	86	19	109	22	34	0.556796	Female	M2
FM2014015509	145	23	195	26.8	21	-0.2733	Male	M2
FM2014040268	81	19	128	23	14	-0.290575	Female	M2
FM2014049742	175	24	222	28	35	0.112157	Male	M2
FM2014033995	109	21.5	128	23.8	11	-0.72967	Female	M2
FM2014022857	88	19.5	91	21.2	35	0.570457	Female	M2
FM2014016607	121	21.5	154	25	34	0.329167	Female	M2
FM2014025927	83	18.5	99	21	27	0.349943	Male	M2
FM2014042260	84	19	80	21.5	34	0.572483	Male	M2
FM2014022050	129	22.7	172	26.5	19	-0.295436	Male	M2
FM2014049319	82	19	87	20.5	14	-0.298756	Male	M2
FM2014028658	112	21	156	25	35	0.409682	Female	M2
FM2014017214	110	22	137	24	40	0.555226	Male	M2
FM2014045668	127	22	167	26.5	32	0.236278	Male	M2
FM2014043952	101	20	131	23.5	15	-0.368697	Female	M2
FM2014022470	86	19.5	130	24	33	0.526943	Female	M2
FM2014036373	100	20	138	24	18	-0.179742	Male	M2
FM2014037687	99	20.5	162	25.5	11	-0.665518	Male	M2
FM2014031239	105	21.5	150	24.5	20	-0.106908	Female	M2
FM2014017831	122	21	157	25.2	42	0.534989	Female	M2
FM2014023432	80	19	113	22.5	15	-0.213301	Male	M2
FM2014011331	118	21.5	141	24.5	27	0.11538	Female	M2
FM2014009763	116	21	170	26	12	-0.684153	Male	M2
FM2014033339	116	21	158	25.5	29	0.198236	Male	M2
FM2014025144	83	19.4	88	21	34	0.580467	Male	M2
FM2014040180	103	20.5	163	26	23	0.0456749	Female	M2
FM2014016620	88	19.5	118	23	26	0.273205	Male	M2
FM2014030710	95	20	119	22.7	40	0.652962	Male	M2
FM2014047636	81	19.5	134	24.5	24	0.248421	Female	M2
FM2014049309	99	21	144	25	28	0.268791	Male	M2
FM2014036060	131	23	164	25.2	26	0.00796499	Male	M2
FM2014012790	188	24.5	226	28.7	42	0.246708	Male	M2
FM2014041473	85	19	106	22	26	0.296329	Male	M2
FM2014045144	181	25	220	25	52	0.485579	Female	M2
FM2014034468	211	26	242	29	35	-0.0125574	Female	M2
FM2014039453	82	20.5	117	23.2	23	0.197681	Female	M2
FM2014044919	83	18.5	107	22	19	-0.00145476	Male	M2
FM2014038572	150	22.5	187	26	24	-0.16237	Male	M2
FM2014026323	164	24	215	28	30	0.00128643	Female	M2
FM2014048960	143	24	208	28	41	0.405009	Female	M2
FM2014033540	83	19.5	116	23.5	20	0.0498385	Female	M2
FM2014046904	98	20.5	94	21.8	13	-0.491696	Male	M2
FM2014011599	193	26.5	254	30	55	0.498873	Male	M2
FM2014011165	215	25.5	288	30.5	22	-0.489383	Male	M2
FM2014033375	86	19.5	75	20.5	18	-0.0791931	Male	M2
FM2014014347	89	19.5	142	24	35	0.562924	Female	M2
FM2014046543	84	18.5	120	23	30	0.44732	Male	M2
FM2014016646	90	20	121	24	21	0.0446493	Male	M2
FM2014036872	103	21	156	25.5	40	0.59906	Male	M2
FM2014018677	169	24	210	27.3	51	0.511893	Male	M2
FM2014037254	184	26	218	28.5	50	0.435399	Male	M2
FM2014010984	115	21.7	149	25	20	-0.167556	Female	M2
FM2014014700	112	21.5	152	25	27	0.150171	Male	M2
FM2014035207	93	20	143	25	33	0.474775	Female	M2
FM2014029627	91	19.5	121	23	17	-0.174026	Female	M2
FM2014045603	91	20	130	23.3	20	-0.0115074	Male	M2
FM2014040140	170	24	155	25.7	40	0.265014	Female	M2
FM2014048576	118	22.5	113	23.5	25	0.0384194	Male	M2
FM2014007892	102	20	125	23.5	12	-0.598409	Male	M2
FM2014011300	111	20.5	119	23.5	22	-0.0486443	Female	M2
FM2014035335	114	22	164	26	19	-0.213027	Male	M2
FM2014015141	188	25	211	28	32	-0.0252254	Female	M2
FM2014023873	160	24	169	26.5	12	-0.898543	Male	M2
FM2014023041	129	22	198	27	25	-0.0209991	Male	M2
FM2014048021	160	24	162	26.5	23	-0.247955	Male	M2
FM2014032893	105	21	137	24	11	-0.704745	Male	M2
FM2014041527	223	26.5	198	28.5	55	0.402552	Female	M2
FM2014022010	177	24.5	248	30	38	0.18682	Female	M2
FM2014015889	206	25.5	260	29.5	16	-0.779329	Male	M2
FM2014027463	104	20.5	123	23.5	26	0.161836	Female	M2
FM2014020117	101	21	163	26	21	-0.0322246	Male	M2
FM2014034357	82	19	77	20.5	23	0.197681	Female	M2
FM2014033674	91	19.5	122	23	36	0.576279	Female	M2
FM2014027860	84	19	66	19.5	23	0.181616	Male	M2
FM2014008213	92	19	118	23	12	-0.529619	Female	M2
FM2014038672	108	20.5	132	24.5	17	-0.288207	Male	M2
FM2014022561	103	20.5	137	24.5	31	0.344168	Female	M2
FM2014045312	175	24	224	28	63	0.699944	Male	M2
FM2014025551	81	20.5	118	23.5	28	0.402572	Male	M2
FM2014034097	108	21	167	25.7	29	0.245875	Female	M2
FM2014009256	138	23	171	26	36	0.298683	Female	M2
FM2014027005	83	19	120	23.5	23	0.1896	Male	M2
FM2014013157	83	19	124	22.5	8	-0.866452	Female	M2
FM2014047193	93	21	127	24	21	0.0227894	Male	M2
FM2014027588	90	20	110	23	22	0.0911693	Male	M2
FM2014049382	155	24	267	30.5	26	-0.104187	Male	M2
FM2014008899	89	20	159	25.6	17	-0.159211	Male	M2
FM2014042986	81	19	113	22.9	35	0.625715	Male	M2
FM2014021487	101	21	152	25	31	0.35724	Male	M2
FM2014044843	147	22.5	192	27	19	-0.382516	Male	M2
FM2014022982	116	21	157	26	16	-0.396471	Male	M2
FM2014040921	148	23	202	27.5	46	0.497167	Male	M2
FM2014035776	86	19	111	22.3	16	-0.196976	Female	M2
FM2014047726	97	20.5	100	23	43	0.711393	Male	M2
FM2014031127	144	23	175	25.5	29	0.054087	Female	M2
FM2014017519	96	20.5	138	25	24	0.135155	Male	M2
FM2014026743	107	21	156	25.6	22	-0.0241768	Female	M2
FM2014019196	104	20.5	145	25	38	0.541326	Female	M2
FM2014035988	155	23	193	26.5	48	0.508918	Female	M2
FM2014018393	135	22.5	175	26.5	26	-0.0120866	Female	M2
FM2014031580	125	22	180	26	35	0.336472	Male	M2
FM2014036497	207	26	347	31.2	25	-0.33627	Male	M2
FM2014043862	89	20	151	25	24	0.18563	Male	M2
FM2014029268	227	26	237	29	37	-0.00571543	Female	M2
FM2014041076	83	20	137	24	27	0.349943	Male	M2
FM2014047718	83	18	103	21.3	21	0.0986287	Female	M2
FM2014008533	105	20.5	147	24.5	18	-0.212268	Male	M2
FM2014029222	128	22	126	23.7	24	-0.056633	Male	M2
FM2014009378	152	24	165	26	31	0.0847335	Female	M2
FM2014013626	271	28.5	345	33	68	0.484762	Male	M2
FM2014021287	92	19.5	117	23	20	-0.0187934	Female	M2
FM2014015919	153	24	195	27	29	0.0136705	Male	M2
FM2014034905	124	21.5	108	23	37	0.397397	Female	M2
FM2014018865	147	23	189	27	22	-0.235913	Female	M2
FM2014033420	173	25	209	28	36	0.147991	Male	M2
FM2014038023	87	19.5	121	23.7	24	0.200782	Male	M2
FM2014007905	122	22	184	26.5	35	0.352667	Male	M2
FM2014024318	97	20	120	23	29	0.317489	Female	M2
FM2014013241	101	21	153	26	23	0.0587472	Male	M2
FM2014025795	89	19.5	121	23.5	28	0.33978	Male	M2
FM2014045938	89	20	143	25	23	0.14307	Male	M2
FM2014037016	81	18.5	96	22	19	0.0148062	Male	M2
FM2014046331	86	19.5	77	20.5	30	0.431633	Male	M2
FM2014034422	105	21	146	25.5	29	0.264656	Male	M2
FM2014025777	162	24	236	29	28	-0.0595264	Male	M2
FM2014011712	209	26.5	248	30.5	57	0.481495	Female	M2
FM2014028208	113	20.5	167	25	38	0.485994	Male	M2
FM2014019622	93	18.5	126	22.5	36	0.561786	Male	M2
FM2014022860	179	24	139	25	13	-0.893308	Male	M2
FM2014049677	154	23.5	155	26	30	0.043229	Female	M2
FM2014036103	90	20	132	24	26	0.258223	Male	M2
FM2014010648	135	22.5	189	26.5	22	-0.179141	Male	M2
FM2014039280	85	18.5	164	24	14	-0.32271	Male	M2
FM2014033979	119	21	185	25.5	22	-0.0950399	Male	M2
FM2014012818	91	20	122	23.5	37	0.603678	Male	M2
FM2014039514	152	23	135	24.7	35	0.206094	Female	M2
FM2014010920	142	22.5	199	25	29	0.0634111	Male	M2
FM2014024709	245	27.5	249	30	34	-0.141145	Male	M2
FM2014022844	183	25	181	27.5	37	0.137927	Male	M2
FM2014035618	94	19.5	113	22.5	25	0.190013	Female	M2
FM2014045999	88	20	131	24.5	24	0.193163	Male	M2
FM2014021316	158	24	228	29	62	0.752071	Female	M2
FM2014014739	107	20	138	23	27	0.180618	Male	M2
FM2014030966	91	19.5	108	23	26	0.250857	Male	M2
FM2014016271	92	20	124	23.7	35	0.540822	Male	M2
FM2014025780	81	19	109	22	24	0.248421	Male	M2
FM2014035786	156	23	219	27.5	45	0.440092	Male	M2
FM2014041777	106	21	145	25	34	0.417401	Male	M2
FM2014023834	83	19.5	104	22.5	16	-0.173305	Male	M2
FM2014021983	142	23	162	27	57	0.739167	Female	M2
FM2014015367	112	21.5	150	25	45	0.660997	Female	M2
FM2014033763	86	19	116	23	32	0.496171	Female	M2
FM2014013007	98	20.5	138	24.5	28	0.27556	Male	M2
FM2014036516	237	27.5	332	33	66	0.544281	Male	M2
FM2014047658	129	22	161	25.5	35	0.315473	Male	M2
FM2014019597	116	21.5	98	22	38	0.468526	Female	M2
FM2014019625	101	20.5	163	25.5	29	0.290549	Female	M2
FM2014030100	103	20	136	24.5	26	0.168277	Female	M2
FM2014013566	165	24.5	226	29	29	-0.0366678	Male	M2
FM2014049905	90	19.5	125	23.5	22	0.0911693	Male	M2
FM2014044365	103	21	148	25.5	30	0.311378	Male	M2
FM2014012356	220	25.5	285	29	25	-0.376876	Male	M2
FM2014025439	111	20.5	100	22	51	0.792139	Male	M2
FM2014010326	106	20	143	25.5	36	0.47456	Male	M2
FM2014020050	108	21	139	24	27	0.174416	Female	M2
FM2014038216	87	19.5	118	23.5	22	0.11377	Female	M2
FM2014016280	95	20	145	25	28	0.296287	Female	M2
FM2014034075	126	21.5	148	24.5	34	0.302173	Female	M2
FM2014014752	226	26.5	211	29	43	0.14751	Female	M2
FM2014020989	87	19.5	130	24	30	0.423925	Male	M2
FM2014039780	140	23	157	25.5	38	0.343158	Male	M2
FM2014029100	120	21.5	197	26	16	-0.419072	Male	M2
FM2014033716	80	18.5	113	22	31	0.512636	Female	M2
FM2014049780	118	21	151	24.5	35	0.374892	Female	M2
FM2014013033	108	21	174	26	23	0.0140734	Female	M2
FM2014029503	93	20	99	22.3	16	-0.249144	Female	M2
FM2014012499	94	19.5	94	22	17	-0.19565	Male	M2
FM2014032978	86	20	121	23.5	39	0.693997	Female	M2
FM2014034937	101	20.5	147	25	35	0.478601	Female	M2
FM2014017081	113	21.5	159	26	16	-0.379003	Female	M2
FM2014022626	151	23.5	156	25.7	42	0.392816	Female	M2
FM2014044232	125	21.5	156	25	33	0.277632	Male	M2
FM2014043138	82	19.5	104	23	25	0.281063	Female	M2
FM2014021439	104	21	162	26	15	-0.38821	Female	M2
FM2014017603	105	21	174	27	41	0.610932	Female	M2
FM2014044284	145	23	145	25	55	0.689511	Male	M2
FM2014027895	104	20.5	138	24	61	1.01461	Male	M2
FM2014032512	101	20.5	162	26	31	0.35724	Male	M2
FM2014012055	127	22.7	193	27	22	-0.138416	Male	M2
FM2014012313	150	22.5	166	26	30	0.0607739	Male	M2
FM2014010873	134	23.1	149	26	36	0.318292	Male	M2
FM2014025433	116	21.5	173	25.5	27	0.126777	Male	M2
FM2014013769	142	22	145	25.5	33	0.192623	Female	M2
FM2014042826	169	24	199	27.2	40	0.268947	Male	M2
FM2014032580	90	20.5	132	25	33	0.496634	Female	M2
FM2014020570	108	20.5	131	24	32	0.344315	Female	M2
FM2014049008	84	18	149	25	52	0.997366	Male	M2
FM2014046761	168	23.5	124	25	65	0.758411	Female	M2
FM2014030122	85	19.5	112	23.5	26	0.296329	Female	M2
FM2014048587	97	21	142	25	43	0.711393	Male	M2
FM2014022459	122	22.5	141	25.3	28	0.129524	Male	M2
FM2014008963	143	23	132	24.5	44	0.475627	Male	M2
FM2014020953	129	21.5	185	26	49	0.651945	Female	M2
FM2014010701	95	20	128	24.5	19	-0.0914789	Male	M2
FM2014016233	108	21.5	144	25	36	0.462098	Male	M2
FM2014023698	140	23	131	26.5	23	-0.158934	Male	M2
FM2014038046	247	27	233	30	23	-0.537431	Female	M2
FM2014037605	103	20	110	23	42	0.64785	Male	M2
FM2014022063	130	21.5	197	26.5	35	0.310325	Female	M2
FM2014014249	105	20	146	24.5	29	0.264656	Male	M2
FM2014021304	85	19.5	121	23	31	0.47222	Female	M2
FM2014021560	99	20.5	144	24.5	17	-0.2302	Female	M2
FM2014023835	132	22	184	26	23	-0.119707	Female	M2
FM2014047231	99	20.5	144	24.5	20	-0.067681	Male	M2
FM2014036584	111	21.5	176	26.6	18	-0.249315	Male	M2
FM2014036216	95	20	110	22	43	0.725282	Male	M3
FM2014023019	119	21.9	161	25	30	0.215115	Female	M3	#REF!
FM2014014221	91	19.5	106	22.3	25	0.211636	Female	M3
FM2014030475	122	21.5	171	25.5	45	0.603982	Female	M3
FM2014012031	148	23	147	25.2	28	0.000729661	Female	M3
FM2014047270	102	19	131	23.5	45	0.723347	Male	M3
FM2014014539	138	22	156	24.2	47	0.565312	Male	M3
FM2014030886	142	22	154	24.8	24	-0.125831	Female	M3
FM2014043033	94	19.5	140	25	33	0.467644	Male	M3
FM2014031762	80	19	99	21.5	18	-0.0309793	Female	M3
FM2014030893	193	25	237	28.5	41	0.205112	Female	M3
FM2014026997	126	21.5	127	24	36	0.359331	Male	M3
FM2014033289	87	20	126	23.4	34	0.549088	Female	M3
FM2014022934	124	21.5	122	23.5	39	0.450041	Female	M3
FM2014015012	158	24	185	27	55	0.63227	Female	M3
FM2014032500	137	21.5	168	25	24	-0.101933	Female	M3
FM2014044354	104	20	125	23	70	1.15223	Female	M3
FM2014015074	190	25	234	28.5	51	0.43381	Female	M3
FM2014029037	117	21	121	23	53	0.795509	Male	M3
FM2014023691	98	21	112	22.9	25	0.162231	Female	M3
FM2014042224	87	20	101	22	47	0.872876	Female	M3
FM2014047782	150	23	159	25.5	29	0.0268723	Female	M3
FM2014011751	116	21	101	22	53	0.801232	Female	M3
FM2014024071	98	19.5	114	22	36	0.526874	Male	M3
FM2014038246	111	21	141	24	49	0.752133	Male	M3
FM2014015407	139	22	125	23.3	34	0.236711	Male	M3
FM2014021978	108	21.5	183	26.2	36	0.462098	Male	M3
FM2014007870	181	24	201	26.7	33	0.0308429	Male	M3
FM2014047719	130	22.5	136	24.5	23	-0.109529	Male	M3
FM2014032948	100	19.5	142	23.2	30	0.331084	Male	M3
FM2014031584	132	23.5	149	24.5	40	0.433678	Male	M3
FM2014042317	97	19.5	134	23	37	0.561111	Female	M3
FM2014042226	96	19.5	114	22.5	25	0.175977	Male	M3
FM2014008889	133	22.5	134	24.5	48	0.610968	Male	M3
FM2014014615	132	22.3	172	26	53	0.715091	Female	M3
FM2014017206	104	19.5	121	22.3	27	0.199576	Male	M3
FM2014013092	109	21.7	122	23	23	0.00792896	Female	M3
FM2014048633	84	19	97	21.2	57	1.08917	Male	M3
FM2014020512	126	23	160	26	61	0.886686	Female	M3
FM2014034906	125	21.5	143	24.3	46	0.609766	Female	M3
FM2014022085	185	25.1	194	28	58	0.580206	Female	M3
FM2014015874	130	21.5	161	24	50	0.667	Male	M3
FM2014013476	96	20	119	23	24	0.135155	Male	M3
FM2014018804	92	20	114	22.4	73	1.27593	Male	M3
FM2014008617	98	20	118	23	35	0.498703	Male	M3
FM2014013245	125	22	163	25.3	31	0.215111	Male	M3
FM2014034052	133	21	171	24.5	34	0.266128	Male	M3
FM2014035292	164	24	155	25.8	52	0.551333	Female	M3
FM2014010919	153	24	163	25.5	21	-0.309103	Female	M3
FM2014042756	127	22	171	25.3	30	0.171739	Female	M3
FM2014017477	98	20.5	118	22.5	25	0.162231	Male	M3
FM2014008210	87	19	93	21.2	23	0.158222	Female	M3
FM2014025354	127	21.5	179	26.7	47	0.62069	Male	M3
FM2014012481	99	20.5	97	22.5	27	0.232424	Female	M3
FM2014040284	104	20.5	126	23.5	26	0.161836	Male	M3
FM2014026618	160	24	165	26.3	33	0.113058	Male	M3
FM2014019560	100	20	124	23	41	0.643459	Female	M3
FM2014015860	81	20	115	23	25	0.289243	Male	M3
FM2014012341	145	23	158	25.4	33	0.178685	Female	M3
FM2014013466	90	20	101	22.5	30	0.401324	Female	M3
FM2014015822	217	27	236	29.5	52	0.364645	Female	M3
FM2014018446	168	24.5	234	29	68	0.803532	Female	M3
FM2014025074	171	24.3	194	26.7	33	0.0687319	Male	M3
FM2014010538	105	21	107	22.5	44	0.681549	Male	M3
FM2014024935	103	20	136	23.2	48	0.781382	Female	M3
FM2014038536	93	19.5	107	22.5	31	0.412254	Male	M3
FM2014013915	145	23.6	120	24	60	0.776522	Male	M3
FM2014027545	100	20.5	110	23	16	-0.297525	Male	M3
FM2014013136	178	24.5	218	27.6	31	-0.0205352	Male	M3
FM2014008501	91	19.5	93	22.5	42	0.73043	Male	M3
FM2014023826	95	20	130	23.5	30	0.365279	Female	M3
FM2014027019	106	20.5	98	22	31	0.325028	Male	M3
FM2014033241	105	20	136	23	21	-0.0581178	Male	M3
FM2014016164	120	22	176	26	31	0.242326	Female	M3
FM2014032065	117	21	129	23	48	0.696418	Female	M3
FM2014049858	96	20	109	22.5	33	0.453609	Male	M3
FM2014012667	137	23	203	27.5	34	0.246373	Female	M3
FM2014010958	100	21	131	23.3	58	0.99033	Male	M3
FM2014046509	106	20.5	126	23	49	0.782861	Male	M3
FM2014043415	113	21	145	24	54	0.837392	Male	M3
FM2014047223	89	20	63	20.3	41	0.721148	Male	M3
FM2014031729	93	20	125	23.5	41	0.691839	Female	M3
FM2014026629	121	21	130	23.5	56	0.828158	Female	M3
FM2014010102	153	23	157	25	49	0.538195	Female	M3
FM2014010703	111	21	105	22.2	24	0.038367	Female	M3
FM2014037668	128	21.5	132	23.5	32	0.231049	Female	M3
FM2014047278	126	22	159	25	49	0.667632	Male	M3
FM2014044266	84	19	94	21.5	35	0.60147	Male	M3
FM2014047407	141	22.5	137	24.7	27	-0.00333639	Male	M3
FM2014042215	88	19.5	108	21.6	28	0.347313	Male	M3
FM2014032598	81	19	101	22	42	0.808037	Male	M3
FM2014036438	119	21.5	153	24.9	50	0.725941	Male	M3
FM2014043198	105	20	127	22.6	19	-0.158201	Female	M3
FM2014036612	166	24	197	27.5	41	0.30558	Male	M3
FM2014021724	110	20.5	108	22	48	0.737547	Female	M3
FM2014025880	101	21	140	24.5	28	0.255457	Male	M3
FM2014012731	99	20.3	124	22.6	52	0.88783	Male	M3
FM2014044833	120	21	106	22.5	39	0.4719	Male	M3
FM2014026612	84	18	96	21	31	0.480109	Male	M3
FM2014023722	137	22.5	142	25	38	0.357599	Female	M3
FM2014034964	124	22	144	24.5	55	0.793812	Female	M3
FM2014030308	94	20	122	23.6	30	0.372334	Female	M3
FM2014008946	410	32.5	456	25.6	125	0.817542	Female	M3
FM2014008199	120	21.5	123	23.2	37	0.419257	Female	M3
FM2014028816	105	20.5	157	24.1	37	0.508278	Male	M3
FM2014031242	253	27.5	331	31.2	74	0.615139	Female	M3
FM2014041154	103	20.5	147	24.5	41	0.623753	Male	M3
FM2014032085	119	21	171	25	32	0.279654	Male	M3
FM2014010886	177	23.7	229	27	23	-0.315272	Male	M3
FM2014011124	121	22	138	24	48	0.674007	Female	M3
FM2014033546	92	19	92	21.2	53	0.955766	Male	M3
FM2014022089	263	28	286	31	44	0.0694203	Male	M3
FM2014013227	98	22.4	111	22.8	26	0.201452	Male	M3
FM2014047769	84	19.5	121	23	20	0.0418544	Female	M3
FM2014046432	173	24.5	195	27	41	0.278044	Female	M3
FM2014013940	239	28	244	30.2	69	0.583131	Female	M3
FM2014037652	102	21	120	23	24	0.0947386	Male	M3
FM2014019299	95	20	133	23.2	38	0.601668	Male	M3
FM2014030880	176	24	190	26.5	34	0.0793712	Male	M3
FM2014029895	87	19.5	86	21	45	0.82939	Male	M3
FM2014010516	104	21	129	24	39	0.567301	Female	M3
FM2014033561	99	19.5	121	22.2	32	0.402323	Female	M3
FM2014019079	154	22.5	147	24	54	0.631016	Male	M3
FM2014021435	124	21	145	24	35	0.341827	Male	M3
FM2014038478	105	21	131	24.5	26	0.155456	Female	M3
FM2014030401	103	20.5	94	21.8	26	0.168277	Female	M3
FM2014035794	81	19	107	21.5	22	0.16141	Male	M3
FM2014029496	106	20.5	122	23.3	41	0.604613	Male	M3
FM2014048579	99	20.5	101	23	39	0.600148	Female	M3
FM2014018452	108	21	128	23.3	41	0.592151	Female	M3
FM2014016701	135	23	137	24.5	34	0.256177	Female	M3
FM2014034974	97	20	139	24.2	32	0.415929	Female	M3
FM2014015063	97	21	111	23	26	0.208289	Male	M3
FM2014031337	92	20	110	22.7	48	0.856675	Male	M3
FM2014034151	160	23.5	203	27	45	0.423213	Male	M3
FM2014041564	108	21	147	25	25	0.097455	Female	M3
FM2014041962	82	19	106	22	31	0.496174	Male	M3
FM2014037227	117	21.5	125	23.5	36	0.408736	Male	M3
FM2014028718	99	20	111	22.6	37	0.547505	Male	M3
FM2014022567	131	22.5	188	26.2	48	0.621069	Male	M3
FM2014046811	188	24.5	233	28.3	69	0.743145	Female	M3
FM2014008586	175	24.2	176	27	29	-0.0758948	Female	M3
FM2014019988	106	21	121	23.1	105	1.545	Female	M3
FM2014037829	83	19	103	22	35	0.609454	Female	M3
FM2014046932	229	26	222	27.6	52	0.328762	Male	M3
FM2014032890	175	25	221	28.5	40	0.245689	Male	M3
FM2014049755	119	21.5	156	25.6	50	0.725941	Female	M3
FM2014034535	114	21	141	23.7	55	0.849868	Male	M3
FM2014034943	83	19	72	20.1	28	0.386311	Female	M3
FM2014035789	90	19.5	115	22	71	1.26281	Female	M3
FM2014020165	104	21	119	23.2	56	0.929091	Male	M3
FM2014030754	114	21	142	24.2	35	0.397882	Female	M3
FM2014028017	102	20.5	123	23.5	28	0.248889	Female	M3
FM2014035633	113	20.5	129	22.6	32	0.314144	Female	M3
FM2014025484	108	20.5	145	24	39	0.542141	Male	M3
FM2014045570	103	20.5	133	23.6	30	0.311378	Male	M3
FM2014008639	145	22.5	165	25.6	19	-0.373384	Female	M3
FM2014029968	93	20	115	22	34	0.504628	Female	M3
FM2014033622	130	22	133	24	67	0.95967	Male	M3
FM2014048245	90	19.5	107	22	17	-0.16666	Male	M3
FM2014023867	120	21	146	24.3	36	0.391858	Male	M3
FM2014035357	90	19.5	88	21	37	0.611045	Female	M3
FM2014018490	108	20.5	127	23	33	0.375087	Female	M3
FM2014040573	196	25	219	28	46	0.309898	Female	M3
FM2014017990	94	20	109	22	20	-0.0331309	Male	M3
FM2014027518	117	21	99	21.5	39	0.488779	Male	M3
FM2014010859	98	21	100	22	32	0.409091	Female	M3
FM2014049853	94	20	126	24	33	0.467644	Male	M3
FM2014029911	135	23.5	213	28.1	27	0.0256537	Male	M3
FM2014036833	102	20.5	127	23.7	33	0.413192	Male	M3
FM2014015499	118	21	139	23.5	27	0.11538	Male	M3
FM2014048860	200	25.5	190	27	42	0.205458	Female	M3
FM2014023863	277	28.5	293	32	53	0.220947	Male	M3
FM2014022110	130	21.7	151	24.5	33	0.251485	Female	M3
FM2014030845	169	23.5	183	26	52	0.531311	Male	M3
FM2014043999	145	23	151	24.7	55	0.689511	Female	M3
FM2014013002	105	20.7	134	23.5	27	0.193197	Female	M3
FM2014023640	98	20.5	134	24	40	0.632234	Male	M3
FM2014017114	117	21.5	146	24.8	34	0.351578	Female	M3
FM2014018762	99	20	129	23	57	0.979638	Female	M3
FM2014017559	95	20	121	23	41	0.677654	Male	M3
FM2014048198	103	20	106	22.5	39	0.573742	Male	M3
FM2014014612	97	20	116	23	34	0.476553	Female	M3
FM2014035562	139	22	163	25	54	0.699335	Male	M3
FM2014011137	103	20	91	21.5	23	0.0456749	Male	M3
FM2014007881	125	22	142	24.7	43	0.542324	Female	M3
FM2014024612	94	19.5	109	22.5	48	0.842338	Male	M3
FM2014033238	91	20	132	24	26	0.250857	Male	M3
FM2014017997	100	20.5	139	24.3	48	0.801088	Male	M3
FM2014046170	156	23.5	185	26.5	64	0.792312	Male	M3
FM2014036973	135	29	150	24.5	31	0.163804	Male	M3
FM2014028407	99	20	126	23.5	28	0.268791	Female	M3
FM2014015600	144	23	194	26.5	37	0.297709	Male	M3
FM2014026665	94	20	131	23.5	30	0.372334	Male	M3
FM2014011772	228	26.5	248	29.2	70	0.628931	Male	M3
FM2014013923	163	24.8	227	28.5	38	0.241753	Male	M3
FM2014044026	100	20	112	22.5	53	0.900178	Female	M3
FM2014048139	96	20	100	22	40	0.645981	Male	M3
FM2014020146	93	20	137	24	21	0.0227894	Male	M3
FM2014010113	89	19	125	23.2	46	0.836217	Male	M3
FM2014022981	84	19	82	21	28	0.378327	Male	M3
FM2014030074	94	20	122	24	31	0.405124	Male	M3
FM2014035298	97	20	103	22.3	44	0.734382	Male	M3
FM2014035161	80	19	79	20.5	39	0.742211	Male	M3
FM2014032535	91	20	119	23.1	53	0.963052	Male	M3
FM2014048022	85	19.5	74	21	42	0.775902	Male	M3
FM2014043821	118	21	155	24.5	47	0.669691	Female	M3
FM2014038881	102	21	152	25	94	1.45998	Female	M3
FM2014025884	100	20.5	144	24	28	0.262091	Female	M3
FM2014041927	90	20	130	22.7	50	0.91215	Male	M3
FM2014016356	102	20.5	132	23.5	52	0.867929	Female	M3
FM2014018885	113	22	123	24	42	0.586078	Male	M3
FM2014042307	84	19	117	23	34	0.572483	Male	M3
FM2014021213	120	21.5	159	24.5	44	0.592528	Male	M3
FM2014013904	98	20.7	131	24	61	1.05423	Male	M3
FM2014042821	81	19	96	20.5	42	0.808037	Male	M3
FM2014025407	98	20	94	22	37	0.554273	Female	M3
FM2014032439	88	19.5	103	22.5	27	0.310946	Female	M3
FM2014032834	105	20.5	136	24.3	34	0.42372	Male	M3
FM2014020524	160	23.5	201	27	46	0.445192	Male	M3
FM2014014558	140	23.1	171	26.5	45	0.512234	Male	M3
FM2014015445	147	22.5	148	24.5	68	0.892553	Female	M3
FM2014046993	116	21	125	23.5	33	0.327447	Male	M3
FM2014047986	113	20.5	108	22	28	0.180613	Male	M3
FM2014021727	218	25.5	209	27	48	0.281538	Male	M3
FM2014017258	107	21.5	146	25	31	0.318768	Male	M3
FM2014039881	193	25.5	237	28.7	90	0.99135	Female	M3
FM2014024260	89	19.5	112	23	28	0.33978	Female	M3
FM2014021282	104	20.5	118	23	43	0.66494	Male	M3
FM2014016610	90	20	94	22	23	0.135621	Female	M3
FM2014013891	259	28	330	32	51	0.227274	Female	M3
FM2014016779	109	21	110	22.1	43	0.633635	Male	M3
FM2014020510	118	21	157	25	33	0.316051	Male	M3
FM2014040223	86	19.5	107	22	45	0.837098	Male	M3
FM2014021596	93	19.5	110	22	42	0.715937	Male	M3
FM2014039797	88	19.5	124	23	45	0.821771	Female	M3
FM2014049773	80	19	98	22	47	0.928797	Female	M3
FM2014044845	94	20	104	22	55	0.97847	Female	M3
FM2014020323	137	22.5	158	25.5	25	-0.0611115	Male	M3
FM2014031172	85	19	107	22	34	0.564593	Male	M3
FM2014022140	189	26.2	200	28	53	0.475794	Male	M3
FM2014019277	166	24	221	28	42	0.329678	Male	M3
FM2014027591	85	19	113	22.2	26	0.296329	Male	M3
FM2014017653	101	21	130	24	20	-0.0810147	Male	M3
FM2014032366	115	21.5	122	23.5	46	0.665353	Male	M3
FM2014023284	121	21.5	179	25.5	33	0.299314	Female	M3
FM2014047624	134	22	158	26	39	0.398335	Male	M3
FM2014043578	151	23	159	24.5	75	0.972635	Male	M3
FM2014037250	92	20.5	101	23	39	0.649036	Male	M3
FM2014011146	109	20.5	118	22.5	32	0.338171	Female	M3
FM2014013128	97	20.4	102	22.5	25	0.169069	Female	M3
FM2014039724	107	21	137	24	34	0.411141	Female	M3
FM2014019109	86	19	99	21.5	43	0.791635	Male	M3
FM2014049811	84	19	111	22.5	32	0.511858	Female	M3
FM2014025496	80	19	99	22	17	-0.0881377	Male	M3
FM2014038539	175	24.5	167	27	32	0.0225453	Female	M3
FM2014021599	168	25.5	174	26	37	0.194942	Male	M3
FM2014037666	196	25	205	27.5	64	0.64014	Female	M3
FM2014036865	96	19.5	101	22	27	0.252938	Male	M3
FM2014037261	122	21.5	146	24	31	0.231307	Female	M3
FM2014013260	108	21	121	23	27	0.174416	Female	M3
FM2014022967	82	18.4	95	21	35	0.617535	Male	M3
FM2014047167	81	19	88	21	25	0.289243	Female	M3
FM2014036454	118	22	176	26.3	34	0.345904	Male	M3
FM2014048255	102	21	115	23.5	37	0.527603	Male	M3
FM2014031725	164	24	239	28	43	0.361289	Female	M3
FM2014022903	120	21.5	142	24.2	41	0.521911	Male	M3
FM2014026816	91	19	86	21	27	0.288597	Female	M3
FM2014027551	90	19.5	94	21.5	35	0.555475	Female	M3
FM2014038980	101	21	95	22.5	58	0.983696	Female	M3
FM2014033246	102	20.5	126	23.5	52	0.867929	Female	M3
FM2014032912	195	25.5	208	27.7	66	0.674322	Male	M3
FM2014038917	139	22	143	24	39	0.373912	Female	M3
FM2014033999	126	21.5	147	24.5	45	0.582475	Male	M3
FM2014017491	103	20.5	134	24.5	38	0.547767	Male	M3
FM2014021374	202	25.5	248	29	63	0.60429	Male	M3
FM2014038061	90	19	120	22.5	36	0.583646	Male	M3
FM2014020850	116	21	149	24.5	37	0.441858	Male	M3
FM2014019213	143	23	175	25.5	39	0.354999	Male	M3
FM2014046536	92	20	93	22	50	0.897497	Male	M3
FM2014048524	85	19.5	93	21.2	33	0.53474	Male	M3
FM2014046004	80	19	100	21	40	0.767528	Female	M3
FM2014041483	170	23.5	147	24.5	34	0.102495	Female	M3
FM2014013960	110	21	140	24.2	35	0.421694	Female	M3
FM2014036032	81	20	82	21	41	0.783939	Male	M3
FM2014012638	296	30	354	33	74	0.510492	Female	M3
FM2014017915	134	22	180	26	40	0.423653	Female	M3
FM2014009504	223	27	210	28.5	57	0.43827	Female	M3
FM2014047715	101	20	116	22.7	40	0.612132	Male	M3
FM2014012311	213	26	249	29	31	-0.140208	Male	M3
FM2014043072	93	20	122	23.5	52	0.929511	Female	M3
FM2014013557	99	20.5	105	23	28	0.268791	Male	M3
FM2014011000	134	23	151	25	42	0.472443	Male	M3
FM2014010641	200	25	297	29	61	0.578662	Female	M3
FM2014041953	108	20.5	111	23	48	0.74978	Male	M3
FM2014011677	165	24	200	27	42	0.333706	Male	M3
FM2014024176	156	23.5	209	27.5	59	0.710967	Male	M3
FM2014037205	99	19.5	114	22.2	56	0.961938	Female	M3
FM2014030023	207	25.5	222	28	61	0.555728	Female	M3
FM2014012086	194	25.5	229	28.5	49	0.379915	Male	M3
FM2014029204	100	20	106	22	50	0.84191	Female	M3
FM2014020579	157	23.4	207	27.6	44	0.413359	Female	M3
FM2014009702	148	22.5	219	27.6	26	-0.0733783	Female	M3
FM2014030539	92	20.5	100	22.5	47	0.835622	Male	M3
FM2014022983	91	19.5	106	21.6	33	0.489268	Female	M3
FM2014012267	215	26.5	262	30.7	34	-0.0540648	Male	M3
FM2014027032	104	21.5	100	22	36	0.487258	Male	M3
FM2014038659	88	19.5	112	22.5	21	0.0596312	Male	M3
FM2014017843	87	19	110	22	73	1.31319	Female	M3
FM2014040490	98	21	122	22.5	54	0.932339	Female	M3
FM2014012264	162	23.5	141	24.7	24	-0.213677	Male	M3
FM2014035660	169	23.5	169	25	30	-0.0187351	Male	M3
FM2014045937	150	23	157	25	34	0.185937	Female	M3
FM2014049290	270	28.5	315	31.8	75	0.585207	Female	M3
FM2014038633	87	19.5	110	22.5	31	0.456715	Male	M3
FM2014012077	145	24	185	26.5	27	-0.0219856	Female	M3
FM2014048992	165	25	203	29	46	0.424678	Male	M3
FM2014036986	95	21	138	25	34	0.490443	Female	M3
FM2014035979	119	21.5	129	24	29	0.181214	Male	M3
FM2014013392	126	22	118	23.5	34	0.302173	Male	M3
FM2014034088	102	20	133	23.5	19	-0.138876	Female	M3
FM2014042278	94	19.5	94	21	57	1.01419	Female	M3
FM2014041106	106	20	118	22.9	26	0.149137	Male	M3
FM2014011360	103	20.5	92	21.2	34	0.436541	Male	M3
FM2014027943	85	19	116	22.5	40	0.727112	Male	M3
FM2014019154	136	22.5	176	25	59	0.802434	Female	M3
FM2014047305	82	20	87	22	19	0.00662615	Male	M3
FM2014015118	208	26	219	28	53	0.411933	Female	M3
FM2014049378	104	21	136	24	28	0.235944	Female	M3
FM2014036507	122	21.5	170	26	42	0.534989	Male	M3
FM2014023314	111	21	138	24.5	35	0.415661	Female	M3
FM2014009856	110	21	149	25	35	0.421694	Female	M3
FM2014047676	103	20.5	105	23	51	0.842006	Male	M3
FM2014010511	107	21	149	25	39	0.548342	Female	M3
FM2014032012	208	25	349	30	129	1.30145	Male	M3
FM2014045255	82	19	92	21	32	0.527923	Male	M3
FM2014046514	115	20.5	148	24	37	0.44763	Male	M3
FM2014026190	116	21	151	24	44	0.61513	Male	M3
FM2014028215	84	19	99	22	38	0.683708	Male	M3
FM2014026750	94	20	115	23	30	0.372334	Male	M3
FM2014046826	94	20	107	23	27	0.266974	Female	M3
FM2014025362	135	22	134	24.5	47	0.579964	Female	M3
FM2014011145	94	19.5	90	22	30	0.372334	Female	M3
FM2014048865	85	19	94	22	28	0.370437	Male	M3
FM2014015501	139	22	154	25	36	0.29387	Male	M3
FM2014045683	170	25	175	27	43	0.337334	Male	M3
FM2014020848	97	20	118	23	28	0.282397	Female	M3
FM2014008165	138	22.7	116	24	42	0.452834	Male	M3
FM2014024173	143	22.5	166	25	29	0.0587327	Male	M3
FM2014032815	91	19.5	103	22	48	0.863961	Male	M3
FM2014043024	92	19.5	111	23	39	0.649036	Male	M3
FM2014010728	184	25	228	29	58	0.583819	Male	M3
FM2014028458	160	23.5	178	27	83	1.03539	Female	M3
FM2014037255	88	19.5	86	21	31	0.449096	Male	M3
FM2014037299	91	19.5	102	22	55	1.00009	Male	M3
FM2014028370	83	19	101	22	56	1.07946	Male	M3
FM2014014166	165	24.5	215	29	53	0.566328	Male	M3
FM2014026149	185	25	198	29	77	0.863568	Male	M3
FM2014037839	97	20	122	24	40	0.639072	Female	M3
FM2014014310	141	22.5	138	25	48	0.572028	Female	M3
FM2014027883	122	22	133	25	26	0.0554158	Male	M3
FM2014024573	85	19	104	22	33	0.53474	Female	M3
FM2014034375	211	25.5	276	37	84	0.862911	Female	M3
FM2014035181	121	22	116	24	47	0.652954	Male	M3
FM2014020088	98	21	142	25	56	0.968707	Male	M3
FM2014010221	192	25.5	222	30	47	0.345151	Female	M3
FM2014014691	108	21	140	25	53	0.848871	Female	M3
FM2014036423	119	21	153	25	29	0.181214	Female	M3
FM2014026971	120	21	158	25	37	0.419257	Female	M3
FM2014043633	99	20	104	22	31	0.370574	Male	M3
FM2014038144	94	19.5	98	22	61	1.08201	Female	M3
FM2014010153	97	20.5	134	24	49	0.842013	Male	M3
FM2014024169	121	21	118	23	34	0.329167	Male	M3
FM2014048420	89	19	102	22	38	0.645162	Male	M3
FM2014020981	92	19	130	23	39	0.649036	Male	M3
FM2014032041	198	25	330	31	76	0.805222	Female	M3
FM2014034508	117	21.5	113	23	40	0.514097	Male	M3
FM2014017164	139	22.5	193	27	54	0.699335	Male	M3
FM2014029157	95	20	111	22	18	-0.145546	Male	M3
FM2014009916	188	25.5	224	29	99	1.10416	Male	M3
FM2014033762	207	25.5	203	28	37	0.055772	Female	M3
FM2014014990	152	22	174	25	43	0.411946	Male	M3
FM2014041573	113	21.5	129	24	43	0.609608	Male	M3
FM2014013845	128	22.7	150	25	34	0.291674	Male	M3
FM2014020400	118	20	125	22	56	0.844895	Female	M3
FM2014032147	82	19.5	83	21	26	0.320284	Male	M3
FM2014030343	138	22.5	163	26	60	0.809509	Male	M3
FM2014017525	119	22	133	25	41	0.52749	Male	M3
FM2014029067	122	21.5	116	23	37	0.408237	Male	M3
FM2014038047	82	19	103	22	36	0.645706	Female	M3
FM2014009673	114	21	112	23	48	0.713735	Male	M3
FM2014035123	85	19.5	112	23	38	0.675819	Male	M3
FM2014011225	132	22	157	25	51	0.676624	Female	M3
FM2014008949	269	27.5	319	31	87	0.736101	Male	M3
FM2014032630	88	19	112	23	40	0.703988	Female	M3
FM2014018738	119	21.5	162	25	31	0.247905	Female	M3
FM2014046129	117	21	137	24	30	0.226415	Female	M3
FM2014039111	88	19	116	23	33	0.511616	Male	M3
FM2014013049	102	21	124	23	21	-0.0387928	Female	M3
FM2014046093	94	19.5	91	22	32	0.436873	Female	M3
FM2014024106	141	22	112	22	51	0.632652	Male	M3
FM2014022884	103	20	130	24	47	0.760328	Male	M3
FM2014044083	93	19.5	105	24	54	0.967251	Male	M3
FM2014044653	113	21	140	25	66	1.03806	Male	M3
FM2014028434	88	19.5	103	23	58	1.07555	Male	M3
FM2014023046	99	19.5	126	24	23	0.072081	Male	M3
FM2014035721	91	19.5	118	23	34	0.519121	Male	M3
FM2014049904	135	22	155	26	32	0.195553	Female	M3
FM2014032584	91	19.5	102	22	37	0.603678	Male	M3
FM2014044505	127	21.5	123	24	27	0.0663788	Female	M3
FM2014045334	92	20	106	22	38	0.62306	Male	M3
FM2014012340	170	24	202	27	51	0.50796	Male	M3
FM2014032422	177	24	263	30	52	0.500477	Male	M3
FM2014017158	98	21	133	25	49	0.835175	Female	M3
FM2014039751	87	19.5	112	23	42	0.760398	Male	M3
FM2014046547	89	20	104	23	29	0.374872	Male	M3
FM2014025950	195	24	181	27	71	0.747347	Male	M3
FM2014014244	92	20	93	22	33	0.481982	Male	M3
FM2014028685	94	20.5	156	26	50	0.88316	Male	M3
FM2014014724	109	21	125	24	42	0.610104	Male	M3
FM2014020062	93	20.5	137	24	51	0.910093	Female	M3
FM2014012698	234	26.8	235	30	71	0.625799	Male	M3
FM2014015765	108	20	125	23	22	-0.0303784	Male	M3
FM2014018869	103	22	211	27	27	0.206018	Female	M3
FM2014042779	90	19	112	23	19	-0.0554341	Male	M3
FM2014039143	104	21	134	24	24	0.0817932	Male	M3
FM2014030464	208	26	204	28	53	0.411933	Male	M3
FM2014018306	102	21	108	24	78	1.27339	Male	M3
FM2014046957	108	20.5	146	25	37	0.489497	Male	M3
FM2014013598	186	24	203	27	37	0.127087	Male	M3
FM2014038012	133	22	153	25	28	0.0719718	Male	M3
FM2014035212	92	20	99	23	35	0.540822	Male	M3
FM2014027136	154	23	169	26	27	-0.0621315	Female	M3
FM2014040957	100	20	116	23	42	0.667556	Male	M3
FM2014024967	112	20.9	141	24	38	0.49192	Female	M3
FM2014045572	80	19	86	22	45	0.885311	Female	M3
FM2014011714	150	23.5	191	27	46	0.488218	Male	M3
FM2014009918	92	19.5	111	23	17	-0.181312	Male	M3
FM2014029519	107	20.5	140	24	50	0.796804	Male	M3
FM2014048931	106	21	142	25	33	0.387548	Female	M3
FM2014034871	95	20	114	23	33	0.46059	Male	M3
FM2014014227	104	20.5	118	23	44	0.687929	Female	M3
FM2014009346	164	24.5	184	27	45	0.406752	Male	M3
FM2014039252	180	24	179	27	35	0.0933768	Female	M3
FM2014018739	102	20.5	140	24	17	-0.250102	Male	M3
FM2014037448	81	19	114	23	19	0.0148062	Male	M3
FM2014037263	116	22	164	26	32	0.296676	Male	M3
FM2014037414	152	23	154	26	28	-0.0170492	Female	M3
FM2014037831	203	25	223	29	50	0.369886	Female	M3
FM2014044743	201	25	212	28	91	0.975323	Female	M3
FM2014044080	136	22	182	26	43	0.486097	Male	M3
FM2014027990	88	19.5	128	23	41	0.728681	Male	M3
FM2014018715	93	20	114	23	39	0.641829	Male	M3
FM2014040630	92	20	108	22	28	0.317679	Male	M3
FM2014010902	164	24	232	28	73	0.890548	Male	M3
FM2014046959	82	19.5	104	23	39	0.725749	Male	M3
FM2014022080	157	23.1	182	26	48	0.50037	Male	M3
FM2014015785	91	19.5	102	22.5	40	0.68164	Female	M3
FM2014029675	114	21	108	22	32	0.30827	Male	M3
FM2014008845	162	23	179	27	63	0.751404	Male	M3
FM2014041009	93	19.5	93	22	31	0.412254	Male	M3
FM2014033682	120	21.5	143	24	51	0.740164	Male	M3
FM2014022624	92	20.5	121	24	34	0.511835	Male	M3
FM2014026271	168	23.5	183	26	43	0.345224	Male	M3
FM2014008174	159	24	145	25	23	-0.243775	Male	M3
FM2014039913	245	27.5	244	31	61	0.443368	Male	M3
FM2014041015	94	19.5	98	22	50	0.88316	Male	M3
FM2014049463	120	22	176	27	41	0.521911	Male	M3
FM2014039666	160	24.5	154	27	72	0.893217	Female	M3
FM2014028895	148	22	142	24	55	0.675858	Male	M3
FM2014012651	171	24.8	220	28	68	0.791732	Male	M3
FM2014031283	154	23.5	183	27	32	0.107768	Female	M3
FM2014049311	84	21	83	22	47	0.89627	Male	M3
FM2014043131	98	20	130	23	26	0.201452	Male	M3
FM2014045637	82	19.5	100	28	48	0.933388	Female	M3
FM2014023383	153	23	153	25	75	0.963863	Male	M3
FM2014013840	198	26	177	26	95	1.02837	Female	M3
FM2014011525	95	20	95	22	31	0.398069	Female	M3
FM2014022579	169	25	230	29	64	0.738951	Female	M3
FM2014024497	85	19	103	22	31	0.47222	Male	M3
FM2014017878	94	20	121	23	31	0.405124	Male	M3
FM2014029119	116	21	111	23	32	0.296676	Female	M3
FM2014017873	148	23	174	26	49	0.560345	Male	M3
FM2014034017	81	19	104	22	31	0.504354	Female	M3
FM2014021579	84	20	109	23	28	0.378327	Male	M3
FM2014030864	179	24.5	172	27	36	0.125262	Female	M3
FM2014008421	159	23.5	156	26	55	0.628064	Male	M3
FM2014031736	85	18.5	128	23	27	0.334069	Male	M3
FM2014015583	180	24	196	27	43	0.299229	Male	M3
FM2014011537	97	20	108	22	46	0.778834	Female	M3
FM2014045269	124	22	154	25.5	53	0.756771	Male	M3
FM2014041736	81	19	107	22	62	1.1975	Male	M3
FM2014029548	103	20.5	125	23	32	0.375917	Male	M3
FM2014010874	208	25	263	30	52	0.392885	Male	M3
FM2014030791	125	22	194	27	22	-0.127833	Female	M3
FM2014032478	94	20	135	24	34	0.497497	Male	M3
FM2014008221	171	24	179	27	55	0.579557	Female	M3
FM2014031340	130	22	151	25	46	0.583618	Male	M3
FM2014016388	94	20	117	23	75	1.28862	Male	M3
FM2014017497	180	24.4	240	29	40	0.226908	Female	M3
FM2014008505	116	22	143	25	38	0.468526	Male	M3
FM2014029063	222	26.5	203	28	40	0.0870945	Male	M3
FM2014025762	87	19.5	100	22	37	0.633646	Male	M3
FM2014044858	125	21.5	128	24	41	0.494696	Female	M3
FM2014023893	118	22.5	128	24	20	-0.184724	Male	M3
FM2014010101	93	21	105	23	33	0.474775	Male	M3
FM2014029510	154	23.5	197	27	36	0.225551	Female	M3
FM2014010291	115	21	107	23	30	0.237909	Female	M3
FM2014015468	144	22.5	149	25	34	0.213152	Female	M3
FM2014011316	209	26	251	30	46	0.267085	Female	M3
FM2014008444	183	24	212	28	41	0.240581	Male	M3
FM2014030340	82	20	98	22	37	0.673105	Male	M3
FM2014021335	109	21	114	24	50	0.784458	Male	M3
FM2014048823	85	19	94	21	27	0.334069	Male	M3
FM2014031778	220	26	273	30	44	0.188438	Female	M3
FM2014036109	87	19	119	22	38	0.660314	Male	M3
FM2014045566	155	23	160	25	25	-0.143408	Female	M3
FM2014036135	89	19.5	111	22	25	0.226452	Female	M3
FM2014021766	128	22.5	143	25	27	0.06115	Female	M3
FM2014013589	99	20.5	168	25	31	0.370574	Male	M3
FM2014048858	112	21	110	23	25	0.0732099	Male	M3
FM2014042776	90	19.5	118	23	19	-0.0554341	Male	M3
FM2014032162	118	20.5	157	24	40	0.508423	Male	M3
FM2014012026	163	24.2	203	28	39	0.267728	Male	M3
FM2014026197	193	25	193	27	38	0.129126	Female	M3
FM2014008684	130	22	180	27	38	0.392563	Female	M3
FM2014026147	80	19.5	89	21	33	0.575156	Female	M3
FM2014033288	84	19.5	101	22	22	0.137165	Male	M3
FM2014033564	124	21.5	110	23	44	0.570669	Female	M3
FM2014027116	91	19	112	22	41	0.706332	Female	M3
FM2014048559	119	21	112	22	33	0.310425	Male	M3
FM2014019649	94	20	110	23	52	0.922381	Female	M3
FM2014009409	106	20.5	126	24	22	-0.0179169	Male	M3
FM2014045162	93	20	87	21	38	0.615853	Female	M3
FM2014036177	149	26	181	27	46	0.492677	Female	M3
FM2014018366	138	22	179	26	31	0.149151	Male	M3
FM2014027981	106	21	121	24	23	0.0265348	Male	M3
FM2014012075	253	27	261	30	41	0.0246457	Female	M3
FM2014043053	107	20	145	24	30	0.285978	Male	M3
FM2014029628	98	20.5	100	22	41	0.656927	Male	M3
FM2014027803	147	23.5	190	27	63	0.81618	Male	M3
FM2014009326	115	21.5	128	24	22	-0.0722456	Female	M3
FM2014014153	98	20	121	23	42	0.681025	Male	M3
FM2014041120	180	25	246	30	56	0.56338	Male	M3
FM2014010108	82	19	93	21	25	0.281063	Male	M3
FM2014040977	110	21	130	24	28	0.198551	Male	M3
FM2014023371	105	20	142	24	27	0.193197	Female	M3
FM2014027486	84	19	112	22	37	0.65704	Female	M3
FM2014039500	93	19.5	108	23	59	1.0558	Male	M3
FM2014043942	84	19.5	114	23	44	0.830312	Male	M3
FM2014028789	102	21	146	25	45	0.723347	Male	M3
FM2014019245	124	22	151	26	46	0.61512	Male	M3
FM2014021641	96	20	101	22	56	0.982453	Male	M3
FM2014020866	137	23	168	26	56	0.745364	Male	M3
FM2014040714	88	19	113	23	39	0.67867	Male	M3
FM2014048434	123	21.5	146	25	70	1.04037	Male	M3
FM2014038063	89	20.5	109	23	44	0.791765	Male	M3
FM2014025972	187	26	205	28	56	0.537946	Female	M3
FM2014026189	91	19.5	134	24	33	0.489268	Male	M3
FM2014027910	206	25.5	265	30	62	0.575217	Female	M3
FM2014020868	130	22	180	26	87	1.22089	Male	M3
FM2014016208	98	20	116	23	39	0.606917	Female	M3
FM2014021307	88	19.5	110	23	23	0.150603	Female	M3
FM2014024519	172	24	186	28	82	0.975056	Male	M3
FM2014043878	156	24	153	26	25	-0.147695	Male	M3
FM2014025952	94	20	106	22	33	0.467644	Male	M3
FM2014024514	88	20	111	23	52	0.966353	Female	M3
FM2014035976	80	19.5	104	22	33	0.575156	Female	M3
FM2014030035	135	23	195	27	37	0.340735	Female	M3
FM2014039886	85	19	99	22	57	1.08128	Male	M3
FM2014036186	97	20	102	22	31	0.38418	Male	M3
FM2014045909	81	19	79	21	26	0.328464	Male	M3
FM2014039007	135	23	160	26	60	0.824161	Male	M3
FM2014029300	109	20.5	110	23	59	0.949972	Male	M3
FM2014028255	110	21	148	25	40	0.555226	Male	M3
FM2014009387	178	24	208	27	72	0.822144	Female	M3
FM2014007859	127	22.5	156	25	34	0.296902	Male	M3
FM2014045678	98	19.5	110	23	70	1.19185	Male	M3
FM2014025944	85	19	103	22	38	0.675819	Male	M3
FM2014038993	134	22	152	25	46	0.563415	Female	M3
FM2014021274	83	19	76	20	30	0.455304	Male	M3
FM2014043242	113	21.5	151	26	55	0.855741	Male	M3
FM2014039466	101	20	139	24	47	0.773401	Female	M3
FM2014044370	102	20.5	103	23	47	0.766832	Male	M3
FM2014025297	105	20.5	101	23	42	0.635029	Male	M3
FM2014014644	176	24.5	193	27	53	0.523303	Female	M3
FM2014019980	116	21.5	156	25	42	0.568609	Female	M3
FM2014049850	166	23.5	157	26	50	0.504031	Male	M3
FM2014037046	147	23	160	26	79	1.04249	Male	M3
FM2014008894	221	26	250	29	89	0.889861	Male	M3
FM2014037804	130	22	181	26	29	0.122273	Female	M3
FM2014022930	123	22.3	146	25	40	0.480757	Male	M3
FM2014017630	95	20	135	23	13	-0.470969	Female	M3
FM2014008511	92	19	119	23	23	0.120968	Male	M3
FM2014048055	101	20	113	23	46	0.751894	Female	M3
FM2014027880	179	24.5	177	27	64	0.700626	Male	M3
FM2014012653	141	23.4	142	25	53	0.671119	Female	M3
FM2014029559	170	24	222	28	48	0.447335	Female	M3
FM2014023300	126	23	126	24	37	0.38673	Female	M3
FM2014034385	119	21	147	25	36	0.397437	Male	M3
FM2014023218	127	22	142	24	24	-0.0514042	Female	M3
FM2014009473	97	20.5	137	24	25	0.169069	Female	M3
FM2014043572	83	19	105	22	39	0.717668	Female	M3
FM2014027531	96	20.5	140	24	36	0.54062	Female	M3
FM2014042346	108	21	133	25	33	0.375087	Male	M3
FM2014020896	108	21	132	24	31	0.312566	Female	M3
FM2014017156	89	20	72	21	45	0.814238	Male	M3
FM2014011188	103	20.5	127	24	34	0.436541	Male	M3
FM2014035650	83	19	99	22	18	-0.055522	Male	M3
FM2014048655	100	20.5	105	23	36	0.513405	Female	M3
FM2014015993	95	20	103	22	28	0.296287	Female	M3
FM2014043872	92	20	114	24	24	0.163528	Female	M3
FM2014024075	82	19	115	23	26	0.320284	Female	M3
FM2014032191	89	19.5	101	22	31	0.441563	Male	M3
FM2014011974	113	21.8	148	25	39	0.51197	Male	M3
FM2014016212	97	20	114	23	52	0.901436	Male	M3
FM2014029909	107	20.5	165	25	22	-0.0241768	Male	M3
FM2014041946	212	26	262	30	96	0.993291	Female	M3
FM2014047591	104	21	125	25	39	0.567301	Male	M3
FM2014044412	118	21	150	24	27	0.11538	Female	M3
FM2014040178	143	23	153	25	34	0.217797	Female	M3
FM2014044771	81	19	98	22	47	0.920515	Male	M3
FM2014013628	187	25	257	30	33	0.00910182	Male	M3
FM2014008190	115	21.5	138	24	55	0.844045	Male	M3
FM2014048916	105	20.5	132	24	39	0.560921	Male	M3
FM2014046328	102	20.5	118	24	47	0.766832	Male	M3
FM2014046062	86	19.5	100	23	37	0.641353	Female	M3
FM2014043456	101	20	114	23	37	0.534171	Male	M3
FM2014028888	85	19	86	21	25	0.257108	Male	M3
FM2014048183	148	23	196	27	36	0.252044	Male	M3
FM2014044775	92	19	116	22	52	0.936718	Male	M3
FM2014034427	104	20	137	23	25	0.122615	Male	M3
FM2014028058	83	19	87	22	57	1.09716	Male	M3
FM2014041511	219	26	260	29	59	0.484823	Female	M3
FM2014017870	92	20	124	24	43	0.746674	Male	M3
FM2014017408	100	20.5	145	25	48	0.801088	Male	M3
FM2014040150	177	24	169	26	37	0.160151	Female	M3
FM2014019571	119	21	89	22	58	0.874361	Female	M3
FM2014015147	147	23.5	190	27	35	0.228393	Male	M3
FM2014024065	103	20	110	22	93	1.44278	Male	M3
FM2014034821	165	24	160	27	15	-0.695913	Female	M3
FM2014048650	101	20	123	23	42	0.660923	Male	M3
FM2014043246	83	19	101	22	37	0.665024	Male	M3
FM2014048955	99	20.5	156	25	25	0.155463	Female	M3
FM2014014262	91	20	120	23	60	1.0871	Female	M3
FM2014047146	115	21.5	169	26	25	0.0555877	Male	M3
FM2014023882	92	20	119	23	31	0.419461	Male	M3
FM2014043553	110	21	142	24	41	0.579918	Female	M3
FM2014037759	100	21	139	24	19	-0.125674	Female	M3
FM2014025983	138	22	118	23	38	0.35275	Male	M3
FM2014031255	95	20.5	135	25	35	0.51943	Male	M3
FM2014014621	150	23.4	183	26	37	0.270494	Female	M3
FM2014011609	90	20	100	22	37	0.611045	Female	M3
FM2014033434	84	19	109	23	21	0.0906446	Male	M3
FM2014042679	106	20.5	119	23	38	0.528627	Female	M3
FM2014034143	170	24	206	28	43	0.337334	Female	M3
FM2014016340	145	23.5	173	27	41	0.39575	Female	M3
FM2014013525	248	26.5	367	32	89	0.813017	Female	M3
FM2014007856	111	21	124	23	21	-0.0951644	Female	M3
FM2014046786	211	26	232	29	78	0.788803	Female	M3
FM2014025427	100	20	115	23	48	0.801088	Female	M3
FM2014036033	80	19	108	22	53	1.04894	Female	M3
FM2014036473	202	25.5	230	29	88	0.938492	Male	M3
FM2014041405	95	20	93	22	35	0.51943	Male	M3
FM2014046379	95	20	72	21	39	0.627644	Female	M3
FM2014024562	94	20	88	22	41	0.684709	Male	M3
FM2014011251	89	19.5	99	21	54	0.99656	Male	M3
FM2014009239	111	21	121	23.2	34	0.386674	Female	M3
FM2014044857	90	18.5	109	21.5	44	0.784317	Male	M3
FM2014024975	103	20.8	116	22.5	48	0.781382	Female	M3
FM2014040331	102	21	156	25	45	0.723347	Male	M3
FM2014043938	91	19.5	124	23.5	27	0.288597	Male	M3
FM2014029058	143	22.5	147	25	52	0.642681	Female	M3
FM2014027053	99	20	141	24	29	0.303883	Male	M3
FM2014009010	191	25	232	28	29	-0.13422	Male	M3
FM2014015929	86	19	60	18	41	0.744007	Male	M3
FM2014007849	108	21	120	23	24	0.056633	Female	M3
FM2014034765	123	21.5	154	25	35	0.347225	Female	M3
FM2014047339	128	22.5	129	24.5	50	0.677336	Male	M3
FM2014041338	104	21	120	23.5	49	0.79556	Male	M3
FM2014018330	85	19.5	110	23	51	0.970058	Female	M3
FM2014029521	103	21	114	23	43	0.671381	Female	M3
FM2014016842	87	19	76	20	101	1.63785	Male	M3
FM2014042720	81	19	96	21.5	14	-0.290575	Male	M3
FM2014014133	81	18.5	92	20.5	28	0.402572	Male	M3
FM2014040330	107	21	137	24	40	0.57366	Female	M3
FM2014046387	107	21	118	23	46	0.713422	Female	M3
FM2014042003	81	19	99	22	65	1.24475	Male	M3
FM2014020104	122	22	123	24	51	0.729145	Male	M3
FM2014038092	83	18.5	82	21	45	0.860769	Female	M3
FM2014010876	118	21.7	114	22	35	0.374892	Male	M3
FM2014030104	81	18.5	93	21	34	0.596728	Male	M3
FM2014017132	105	21	102	23	72	1.17403	Female	M3
FM2014046778	104	20.5	89	21.5	62	1.03087	Female	M3
FM2014041542	134	22	141	24.2	44	0.518963	Male	M3
FM2014032016	162	23	155	25.2	88	1.08561	Female	M3
FM2014031701	90	19.5	120	22.2	44	0.784317	Male	M3
FM2014027383	96	20	84	21	33	0.453609	Female	M3
FM2014045755	110	21	111	23	26	0.124443	Female	M3
FM2014040702	143	23	162	25.2	52	0.642681	Male	M3
FM2014009320	160	24	154	25.5	53	0.586843	Female	M3
FM2014009787	100	20	127	23	29	0.297182	Male	M3
FM2014046101	99	20.5	116	26	38	0.574173	Male	M3
FM2014035141	129	22.5	118	24.5	52	0.711369	Male	M3
FM2014038973	144	22.5	141	24	88	1.16413	Female	M3
FM2014025023	110	21.2	102	22.2	29	0.233642	Male	M3
FM2014042686	101	20	123	22.3	26	0.18135	Female	M3
FM2014016649	97	21	116	23	46	0.778834	Male	M3
FM2014034127	133	22	158	26	25	-0.0413569	Male	M3
FM2014015182	94	20	112	22	38	0.608723	Female	M3
FM2014049284	88	19.5	129	23	60	1.10945	Female	M3
FM2014049404	110	21	119	23	36	0.449865	Male	M3
FM2014012353	97	20	102	22.5	25	0.169069	Male	M3
FM2014008208	92	20.2	106	22.5	22	0.0765167	Female	M3
FM2014049857	91	19.5	91	22	59	1.0703	Female	M3
FM2014045177	104	21	122	23	55	0.911073	Female	M3
FM2014025304	113	21	126	23	24	0.026462	Male	M3
FM2014020487	106	20.5	120	23	54	0.880025	Male	M3
FM2014030747	222	26	254	29	62	0.525349	Female	M3
FM2014012716	90	20	92	21.2	30	0.401324	Female	M3
FM2014044923	157	23.5	152	26	28	-0.038626	Female	M3
FM2014049436	115	21.5	113	23	72	1.11338	Female	M3
FM2014043621	85	19	121	23	19	-0.0173285	Female	M3
FM2014045184	100	21	135	24.5	48	0.801088	Male	M3
FM2014020814	129	22	155	25.3	48	0.631326	Male	M3
FM2014007938	143	23	121	24	24	-0.130509	Female	M3
FM2014030510	92	18.5	90	21.2	39	0.649036	Male	M3
FM2014043617	94	20	110	22	33	0.467644	Female	M3
FM2014013890	237	27.3	234	29	28	-0.313169	Male	M3
FM2014045181	210	26	265	29.7	53	0.405554	Female	M3
FM2014039847	104	21	131	24.5	40	0.592619	Male	M3
FM2014039396	109	21	99	22.7	47	0.722582	Male	M3
FM2014018285	113	21.5	133	24	42	0.586078	Male	M3
FM2014045081	91	19.5	111	22.1	28	0.324965	Male	M3
FM2014033459	90	19	121	23	40	0.689006	Male	M3
FM2014019711	101	20	103	22	43	0.684453	Female	M3
FM2014027481	107	21	114	23	28	0.216985	Male	M3
FM2014032966	87	19	108	22	25	0.241604	Female	M3
FM2014033738	138	22.5	162	25.6	22	-0.193793	Female	M3
FM2014037816	86	19.5	105	22.7	32	0.496171	Male	M3
FM2014042599	111	21	164	25.1	20	-0.143955	Male	M3
FM2014022650	90	20	114	23	18	-0.109501	Male	M3
FM2014040095	114	21	128	23.2	41	0.556106	Female	M3
FM2014008246	169	24.2	161	26	35	0.135416	Female	M3
FM2014013400	83	19	103	22	31	0.488093	Female	M3
FM2014016687	135	23	156	25.7	50	0.64184	Female	M3
FM2014039674	122	22	160	26	46	0.625961	Female	M3
FM2014017865	89	19.5	111	22.5	34	0.533936	Female	M3
FM2014025397	107	20.5	105	22.5	22	-0.0241768	Male	M3
FM2014038128	115	21.5	128	24	18	-0.272916	Male	M3
FM2014041807	114	20	127	22.5	42	0.580204	Male	M3
FM2014019578	98	20	119	23	40	0.632234	Male	M3
FM2014020078	85	19	112	22	39	0.701794	Female	M3
FM2014018893	127	22	179	26	104	1.41493	Male	M3
FM2014028828	85	19	99	21.5	33	0.53474	Male	M3
FM2014045586	101	20	113	22	42	0.660923	Male	M3
FM2014027056	87	19	97	21.5	48	0.893929	Male	M3
FM2014016594	81	19	96	22	47	0.920515	Male	M3
FM2014033255	112	21	132	23.5	36	0.437853	Female	M3
FM2014020014	345	27.5	362	30.7	30	-0.494499	Male	M3
FM2014018354	85	19.5	111	22.5	30	0.43943	Male	M3
FM2014036569	187	25.5	235	29	62	0.639729	Male	M3
FM2014015018	166	23.5	142	25	61	0.702882	Female	M3
FM2014010537	120	22	135	24	31	0.242326	Male	M3
FM2014040559	143	22.5	176	25.5	58	0.75188	Female	M3
FM2014017021	100	20	119	23.5	24	0.10794	Male	M3
FM2014045514	84	19	94	21	36	0.629641	Female	M3
FM2014039115	167	24	196	27.5	35	0.143352	Male	M3
FM2014031336	82	18.5	108	22	35	0.617535	Male	M3
FM2014040324	102	20.5	115	23	46	0.745326	Female	M3
FM2014038682	91	19.5	86	21	34	0.519121	Female	M3
FM2014034761	101	20	96	21.6	25	0.142129	Male	M3
FM2014044366	186	25	194	27.5	54	0.505153	Female	M3
FM2014039457	235	27	289	30.5	61	0.47115	Female	M3
FM2014029664	92	20	95	21	32	0.45121	Female	M3
FM2014008228	98	22	98	22.5	38	0.580941	Male	M3
FM2014027141	83	20	98	22	55	1.06144	Female	M3
FM2014039505	272	29	298	33	93	0.795398	Male	M3
FM2014022124	139	23.4	157	26	57	0.753402	Male	M3
FM2014030045	94	20	99	22	34	0.497497	Male	M3
FM2014040647	99	20.5	142	24	30	0.337784	Female	M3
FM2014038135	217	27.5	277	31.5	78	0.770111	Male	M3
FM2014015154	95	20	110	22.8	24	0.142136	Male	M3
FM2014012374	140	23.5	123	24.5	48	0.576773	Male	M3
FM2014022489	101	21	133	24	30	0.32445	Female	M3
FM2014025140	97	20	121	23	55	0.957526	Male	M3
FM2014007927	84	20	108	22.3	27	0.341959	Female	M3
FM2014036828	93	20	93	22	28	0.310472	Male	M3
FM2014032916	110	21	135	24	34	0.392707	Female	M3
FM2014038443	80	19.5	95	22	38	0.716235	Female	M3
FM2014024896	103	20	147	23.5	51	0.842006	Female	M3
FM2014012417	261	28	239	30	37	-0.0987624	Male	M3
FM2014031365	145	22.5	138	24	26	-0.059726	Female	M3
FM2014036966	83	19.5	97	22	20	0.0498385	Male	M3
FM2014021799	109	20.5	108	22.3	26	0.130531	Female	M3
FM2014036890	168	24.5	199	28	66	0.773679	Male	M3
FM2014023384	213	26	267	30	33	-0.0776872	Female	M3
FM2014036480	99	20.5	107	23	35	0.491935	Male	M3
FM2014019310	95	20	100	22	29	0.331378	Female	M3
FM2014049665	132	22.5	165	26	33	0.241306	Male	M3
FM2014024522	114	20.5	129	23.5	32	0.30827	Female	M3
FM2014028346	94	19.5	129	23.5	64	1.13002	Male	M3
FM2014031608	83	19.5	83	20.5	31	0.488093	Female	M3
FM2014026807	112	20.5	94	22.3	60	0.948679	Male	M3
FM2014012742	233	27	264	30	43	0.127174	Male	M3
FM2014026751	101	20.5	116	23.5	46	0.751894	Male	M3
FM2014048096	80	19	80	21	26	0.336745	Female	M3
FM2014031768	107	20.5	126	23	44	0.66897	Male	M3
FM2014034448	207	25	224	28.3	59	0.522392	Male	M3
FM2014035265	122	21.5	168	26	44	0.581509	Female	M3
FM2014008999	123	21.5	113	23	54	0.780861	Female	M3
FM2014034613	82	18.5	103	21.5	23	0.197681	Female	M3
FM2014009246	122	22.5	162	24.5	36	0.380838	Male	M3
FM2014020867	128	22	164	25.5	42	0.502983	Female	M3
FM2014031552	104	21	138	24.5	27	0.199576	Male	M3
FM2014043539	89	20	112	23	58	1.06802	Male	M3
FM2014016295	84	19.5	113	23.5	23	0.181616	Male	M3
FM2014049001	80	19	99	22	31	0.512636	Male	M3
FM2014022388	117	21	138	24	50	0.73724	Female	M3
FM2014039313	109	21	123	23	30	0.273632	Female	M3
FM2014030351	87	19	131	24	28	0.354932	Male	M3
FM2014048040	101	20	123	23	32	0.388989	Male	M3
FM2014018391	143	23	194	27	57	0.734488	Male	M3
FM2014038679	154	24	157	26.5	39	0.305593	Female	M3
FM2014043092	95	20	91	22	33	0.46059	Male	M3
FM2014036787	170	24	204	27.5	39	0.239696	Male	M3
FM2014038588	92	19.5	118	23	24	0.163528	Male	M3
FM2014031165	89	19	101	21.5	58	1.06802	Male	M3
FM2014036144	84	20.5	87	21	30	0.44732	Male	M3
FM2014035649	95	20	118	23	37	0.575	Female	M3
FM2014024494	127	22	157	25.5	42	0.508212	Female	M3
FM2014015373	122	22	131	24	56	0.822671	Male	M3
FM2014047609	135	22.5	124	24	33	0.226324	Male	M3
FM2014034125	109	21	108	22.7	19	-0.183126	Male	M3
FM2014049418	91	20	85	21	24	0.170814	Male	M3
FM2014041361	251	27.5	318	31.8	71	0.579045	Male	M3
FM2014017245	91	19	104	22	21	0.0372828	Male	M3
FM2014034473	159	23.5	148	25.5	56	0.646082	Male	M3
FM2014023785	81	19	95	21	25	0.289243	Female	M3
FM2014040754	119	21	117	24	32	0.279654	Male	M3
FM2014022513	106	21	97	22.5	34	0.417401	Male	M3
FM2014046490	107	20.5	110	22	26	0.142877	Female	M3
FM2014016366	105	21.5	138	25.5	114	1.63356	Male	M3
FM2014033740	164	24	165	26.5	25	-0.181035	Male	M3
FM2014008830	174	24	164	26	36	0.144149	Female	M3
FM2014041803	109	21	118	23.5	41	0.586007	Male	M3
FM2014021199	92	20	98	21.7	35	0.540822	Male	M3
FM2014034879	239	26.5	291	30.5	56	0.374376	Female	M3
FM2014010298	222	26.2	234	28.5	44	0.182405	Female	M3
FM2014033722	211	26	236	28	56	0.457446	Male	M3
FM2014041046	92	19.5	101	22	45	0.792137	Male	M3
FM2014041112	195	25.5	215	28.7	45	0.291329	Female	M3
FM2014017675	120	22	123	24.5	48	0.67954	Female	M3
FM2014011586	103	21	123	23.5	45	0.716843	Male	M3
FM2014018820	127	21.5	234	27	49	0.662362	Female	M3
FM2014039493	139	23.5	132	25.5	90	1.21016	Male	M3
FM2014013839	164	25	151	26.5	114	1.33629	Male	M3
FM2014046095	170	23.5	190	26	66	0.765789	Female	M3
FM2014021362	114	21	116	23.3	34	0.368895	Male	M3
FM2014009835	89	19	111	22	38	0.645162	Male	M3
FM2014010499	82	20	79	21	36	0.645706	Female	M3
FM2014034395	118	21.5	143	24.2	34	0.345904	Male	M3
FM2014011931	112	21	109	23	32	0.32007	Female	M3
FM2014026141	194	24.5	194	26.5	30	-0.110708	Male	M3
FM2014044253	95	20	103	22	53	0.934374	Male	M3
FM2014047369	103	20.5	96	22.5	34	0.436541	Male	M3
FM2014026355	84	21	119	23.5	37	0.65704	Male	M3
FM2014015823	95	20	105	22.5	39	0.627644	Male	M3
FM2014032885	107	21	90	22	37	0.495699	Male	M3
FM2014032956	89	19.5	118	23	27	0.303413	Female	M3
FM2014013239	230	27	295	31.3	31	-0.191399	Male	M3
FM2014029128	156	23	144	24.5	30	0.0346267	Male	M3
FM2014032185	202	25	267	29	113	1.18854	Female	M3
FM2014030944	88	19	108	22	33	0.511616	Female	M3
FM2014042728	110	21	120	23.3	35	0.421694	Male	M3
FM2014024932	178	25	205	27.5	19	-0.510083	Male	M3
FM2014019574	166	23.5	184	26.3	52	0.543252	Male	M3
FM2014011623	90	19	110	22.1	30	0.401324	Female	M3
FM2014022435	107	20.5	128	23.5	47	0.734928	Male	M3
FM2014046946	147	23	152	25.6	64	0.831928	Male	M3
FM2014045211	80	19	76	20.3	37	0.689567	Female	M3
FM2014016839	116	21	120	23	32	0.296676	Female	M3
FM2014023693	80	18.5	100	21.5	36	0.662168	Male	M3
FM2014025753	203	25	246	29	58	0.518306	Male	M3
FM2014019676	110	21	118	23	31	0.300334	Female	M3
FM2014035605	90	19	121	22.2	50	0.91215	Female	M3
FM2014028881	179	24	214	27.6	34	0.0681033	Male	M3
FM2014034053	242	26	276	29.4	46	0.16935	Male	M3
FM2014026806	132	21.5	135	23.6	32	0.210535	Male	M3
FM2014019692	125	22	132	24	54	0.770108	Male	M3
FM2014039020	88	19.5	119	23	30	0.416306	Female	M3
FM2014024192	85	19	88	21.5	34	0.564593	Female	M3
FM2014023407	87	19.5	91	22	28	0.354932	Male	M4	#REF!
FM2014037302	102	20.5	108	23	44	0.700874	Female	M4
FM2014026679	88	19	95	21	23	0.150603	Female	M4
FM2014030028	93	20	102	22	35	0.533615	Male	M4
FM2014044402	110	20.5	123	23	93	1.39895	Male	M4
FM2014039925	109	20.5	109	22.5	29	0.239731	Male	M4
FM2014019279	136	22	120	23	46	0.553538	Female	M4
FM2014025141	116	21	128	24.5	36	0.414459	Male	M4
FM2014018698	111	21	137	24	47	0.710461	Male	M4
FM2014046038	219	26	211	28.5	66	0.59694	Female	M4
FM2014044299	118	21	134	24.5	32	0.285279	Female	M4
FM2014025720	107	21.1	105	22.5	36	0.4683	Male	M4
FM2014013615	128	22	142	24.5	24	-0.056633	Male	M4
FM2014031679	84	19.5	104	22	22	0.137165	Female	M4
FM2014034078	195	25.5	203	28	41	0.198239	Female	M4
FM2014010652	116	20.5	136	23.5	39	0.494502	Female	M4
FM2014019065	155	22.5	190	26	54	0.626701	Male	M4
FM2014019572	110	21.5	135	24	72	1.14301	Male	M4
FM2014020863	141	22.3	141	24.5	39	0.364388	Male	M4
FM2014017040	149	23.5	148	25	68	0.883544	Male	M4
FM2014039789	104	21	120	23	27	0.199576	Male	M4
FM2014040165	174	24.5	174	27	36	0.144149	Female	M4
FM2014047805	84	18.5	82	20	24	0.224176	Male	M4
FM2014023301	83	19	91	21	45	0.860769	Female	M4
FM2014022888	81	19.2	76	20	27	0.366204	Male	M4
FM2014047725	105	20.9	113	22	32	0.363096	Male	M4
FM2014034602	100	20	94	21	30	0.331084	Male	M4
FM2014039409	112	21	103	22	33	0.350842	Female	M4
FM2014028693	89	90	111	23	25	0.226452	Male	M4
FM2014030103	91	20	109	22.5	42	0.73043	Male	M4
FM2014008104	202	25.5	274	29	44	0.245345	Male	M4
FM2014038459	104	20.9	119	23	38	0.541326	Female	M4
FM2014047693	95	20.2	97	22	36	0.547601	Male	M4
FM2014049868	84	19	85	21	40	0.735002	Male	M4
FM2014010567	96	20	108	22	37	0.568019	Female	M4
FM2014029111	178	24	190	26.5	22	-0.36348	Male	M4
FM2014044280	132	21.5	145	24	47	0.594946	Female	M4
FM2014037660	182	24.5	199	27	40	0.219542	Male	M4
FM2014035746	97	20	114	22	31	0.38418	Female	M4
FM2014039737	123	21	141	24	32	0.257613	Male	M4
FM2014014144	146	23	168	25.5	47	0.527743	Male	M4
FM2014011603	214	26	245	29	38	0.0602688	Female	M4
FM2014046459	84	18.5	91	20.5	45	0.852785	Male	M4
FM2014035293	84	19.5	90	21	20	0.0418544	Female	M4
FM2014009096	118	21.5	120	23.5	51	0.751369	Male	M4
FM2014011620	137	22.5	148	24.5	54	0.708997	Male	M4
FM2014007939	195	25	205	28	19	-0.570894	Male	M4
FM2014027940	114	21.5	133	24.5	17	-0.324252	Male	M4
FM2014019549	115	21.5	152	25	57	0.879763	Male	M4
FM2014016659	84	19	84	21	42	0.783792	Male	M4
FM2014019635	99	20	103	22	37	0.547505	Male	M4
FM2014024533	84	19.1	88	21	25	0.264998	Female	M4
FM2014015851	80	18.5	92	21	28	0.410853	Female	M4
FM2014012688	155	24	157	25.5	40	0.326596	Male	M4
FM2014045187	81	18.5	86	20	27	0.366204	Female	M4
FM2014030412	114	21	148	24	32	0.30827	Male	M4
FM2014019984	97	21	102	21	36	0.533712	Male	M4
FM2014044748	203	25	221	26	21	-0.497615	Female	M4
FM2014021398	126	21.7	125	23.5	65	0.950199	Male	M4
FM2014017122	89	20	107	22.5	29	0.374872	Male	M4
FM2014048844	169	24.5	119	28.5	35	0.135416	Female	M4
FM2014011288	105	21	113	23	28	0.229564	Female	M4
FM2014037798	108	21	106	22	21	-0.0768984	Female	M4
FM2014041579	82	20.5	105	23.5	23	0.197681	Male	M4
FM2014021297	160	24.3	220	27.5	18	-0.493077	Male	M4
FM2014014766	83	19	78	20	47	0.904254	Male	M4
FM2014039326	162	24	194	27.5	56	0.633621	Female	M4
FM2014048395	153	23.5	159	25.5	32	0.112111	Male	M4
FM2014015772	111	21	123	23.5	29	0.227609	Male	M4
FM2014040614	134	23	137	24.5	32	0.200509	Female	M4
FM2014043911	112	21	148	24	61	0.965208	Male	M4
FM2014010133	82	19.4	94	21	31	0.496174	Male	M4
FM2014034061	82	18.5	90	22	31	0.496174	Male	M4
FM2014029692	139	22.5	149	25	29	0.0776465	Male	M4
FM2014034901	84	19.4	91	21	48	0.917323	Male	M4
FM2014032202	96	20	89	21.5	38	0.594687	Male	M4
FM2014039349	113	21.5	146	25	32	0.314144	Female	M4
FM2014025947	124	21	149	24	66	0.976134	Female	M4
FM2014046871	105	20.5	109	22.5	43	0.65856	Male	M4
FM2014020547	167	22.7	131	24.5	55	0.595337	Male	M4
FM2014031543	94	20	107	21.5	31	0.405124	Male	M4
FM2014016286	94	20.5	99	22	66	1.16079	Male	M4
FM2014015826	106	21	109	22.5	61	1.00191	Male	M4
FM2014010238	111	21	113	22.5	35	0.415661	Male	M4
FM2014036970	90	20	96	22.5	65	1.17451	Male	M4
FM2014028744	135	21.5	164	25	52	0.681061	Female	M4
FM2014032073	113	20.5	104	22	33	0.344916	Female	M4
FM2014028357	80	19	101	22.3	24	0.256703	Male	M4
FM2014013978	84	19	94	21.5	30	0.44732	Female	M4
FM2014014237	113	21	110	22	53	0.8187	Male	M4
FM2014021328	126	22.2	129	23.7	35	0.33116	Male	M4
FM2014042713	103	20	94	22	44	0.69437	Male	M4
FM2014033262	91	19.5	121	23	27	0.288597	Female	M4
FM2014046400	120	21	142	23.5	47	0.658486	Male	M4
FM2014045977	87	19	85	20.5	27	0.318565	Male	M4
FM2014012736	235	27	267	30	66	0.549931	Female	M4
FM2014033259	96	20	106	21.7	35	0.512449	Male	M4
FM2014030537	134	22.5	129	24	69	0.96888	Male	M4
FM2014035627	123	21	151	24.2	39	0.455439	Male	M4
FM2014043137	108	21	140	24.5	53	0.848871	Female	M4
FM2014041356	96	20	109	22	41	0.670673	Male	M4
FM2014035955	100	20	101	22	83	1.34873	Female	M4
FM2014011142	85	20	91	21	24	0.216286	Male	M4
FM2014015777	125	21.5	136	24	74	1.08519	Male	M4
FM2014030033	167	24.5	192	27.5	30	-0.0107985	Male	M4
FM2014023381	86	19.5	106	22	93	1.56303	Male	M4
FM2014045575	121	21.5	127	23.3	48	0.674007	Female	M4
FM2014020074	118	21	113	22.5	34	0.345904	Male	M4
FM2014010891	131	23	143	24.5	44	0.534058	Male	M4
FM2014040575	155	23.5	197	26.7	50	0.54974	Female	M4
FM2014044031	158	23.3	169	25.4	49	0.516757	Male	M4
FM2014010960	157	24	153	25	31	0.0631567	Female	M4
FM2014047298	193	25.5	238	23.3	37	0.102458	Female	M4
FM2014016718	96	21	122	23	29	0.324397	Male	M4
FM2014034786	133	21.5	117	22.5	25	-0.0413569	Male	M4
FM2014031653	94	19.5	98	20.5	15	-0.320813	Female	M4
FM2014010183	106	21.2	106	22.3	32	0.356777	Male	M4
FM2014016343	97	20	115	23.2	53	0.920485	Male	M4
FM2014045719	93	20	110	22.5	40	0.667146	Female	M4
FM2014042723	80	19	74	20	40	0.767528	Male	M4
FM2014017148	170	24	205	27.2	26	-0.165769	Female	M4
FM2014028705	124	21.5	140	24	117	1.54865	Male	M4
FM2014037211	94	20	98	22	73	1.2616	Female	M4
FM2014027395	107	21	129	23.2	47	0.734928	Male	M4
FM2014026258	110	21	107	22	43	0.627547	Male	M4
FM2014040574	196	26.2	196	28	114	1.21746	Male	M4
FM2014023711	94	20	112	22.3	38	0.608723	Male	M4
FM2014016845	100	20	84	21	39	0.593448	Female	M4
FM2014020962	134	22	138	24	54	0.723758	Male	M4
FM2014046369	112	21	146	24	51	0.78616	Male	M4
FM2014038979	104	20	105	21.5	45	0.710402	Male	M4
FM2014031680	104	20	98	21	37	0.514657	Female	M4
FM2014008252	156	23.5	135	24	81	1.02788	Female	M4
FM2014029474	130	22	143	24.2	36	0.338496	Male	M4
FM2014035558	80	19	89	20.3	24	0.256703	Male	M4
FM2014028230	95	19.5	107	22.2	28	0.296287	Female	M4
FM2014014994	108	20	113	22	33	0.375087	Male	M4
FM2014036021	107	21	129	24	49	0.776601	Male	M4
FM2014035584	122	21.5	154	24.3	45	0.603982	Female	M4
FM2014048887	93	20	114	22.7	42	0.715937	Female	M4
FM2014047261	87	19.5	90	21	26	0.280824	Male	M4
FM2014020449	95	20.1	92	21	42	0.701752	Male	M4
FM2014038114	106	20.9	138	24.5	62	1.01817	Male	M4
FM2014043597	131	21.5	121	22.5	38	0.387455	Male	M4
FM2014043435	92	20	102	22	44	0.769664	Male	M4
FM2014014970	180	25.3	231	28.5	56	0.56338	Male	M4
FM2014014205	118	21.5	108	23	78	1.17625	Female	M4
FM2014026210	85	19.1	85	20.2	26	0.296329	Male	M4
FM2014041074	110	20.5	120	22	37	0.477264	Female	M4
FM2014010577	199	25	191	26.7	74	0.775195	Female	M4
FM2014012827	198	26	228	29.2	35	0.0298367	Female	M4
FM2014027185	160	24.3	189	27.3	85	1.0592	Female	M4
FM2014010944	153	23	163	25.5	37	0.257293	Female	M4
FM2014010938	119	22	129	23.1	35	0.369266	Male	M4
FM2014030878	102	20	99	21.5	28	0.248889	Male	M4
FM2014016301	86	19.5	69	20	38	0.668021	Female	M4
FM2014036016	105	21	130	24	50	0.809383	Male	M4
FM2014030102	115	21.5	129	23.5	51	0.768538	Male	M4
FM2014036913	221	26.5	237	29.3	44	0.185415	Male	M4
FM2014008193	89	20	92	21	19	-0.0479853	Male	M4
FM2014045981	107	21	118	23	39	0.548342	Male	M4
FM2014041800	152	23	166	25.8	41	0.364318	Male	M4
FM2014028024	117	20	146	22.8	59	0.902755	Male	M4
FM2014029604	140	22.5	147	24.3	58	0.766015	Male	M4
FM2014017181	118	21.5	134	24	48	0.690745	Male	M4
FM2014040955	137	22.9	170	26	46	0.548654	Male	M4
FM2014023399	117	21.5	154	25	32	0.290953	Female	M4
FM2014011255	177	24	186	26	88	1.02657	Female	M4
FM2014037346	83	19.5	89	21	48	0.925307	Male	M4
FM2014047164	98	20.5	98	22.5	39	0.606917	Female	M4
FM2014028787	108	20	101	21.5	21	-0.0768984	Male	M4
FM2014033518	175	24.5	177	26	26	-0.185094	Female	M4
FM2014033415	134	22	121	23.3	50	0.646796	Female	M4
FM2014020941	120	21.1	155	24.3	25	0.0272147	Male	M4
FM2014008856	187	24	226	27	70	0.761089	Female	M4
FM2014008152	240	28	254	30.3	34	-0.127399	Female	M4
FM2014034083	110	20	119	22.3	26	0.124443	Female	M4
FM2014045098	145	22.5	134	23.5	53	0.652469	Male	M4
FM2014018852	111	21.7	100	22	45	0.666976	Female	M4
FM2014011001	135	22	147	25.2	24	-0.0921294	Male	M4
FM2014041876	98	20.5	126	23	35	0.498703	Male	M4
FM2014012014	81	17.5	79	19	29	0.437663	Female	M4
FM2014042988	88	20	95	21.8	27	0.310946	Male	M4
FM2014014617	133	23	174	25	25	-0.0413569	Female	M4
FM2014040260	87	19	107	21.6	26	0.280824	Female	M4
FM2014038104	91	19	91	21.2	23	0.128255	Male	M4
FM2014020498	97	20.2	92	21.5	27	0.24603	Male	M4
FM2014039774	101	20	106	22.4	38	0.560839	Female	M4
FM2014039133	89	20	102	22	42	0.745245	Male	M4
FM2014045314	184	24.5	212	28	35	0.0787242	Female	M4
FM2014041584	109	20.5	120	23	23	0.00792896	Female	M4
FM2014043175	156	23.5	165	26	56	0.658781	Male	M4
FM2014020480	112	21.9	115	23.5	88	1.33167	Male	M4
FM2014040571	271	29	314	33	83	0.684095	Male	M4
FM2014013463	145	22	156	24.5	42	0.419847	Female	M4
FM2014010698	150	23.5	192	26.5	63	0.802711	Female	M4
FM2014013028	131	22.4	129	23.7	51	0.681694	Male	M4
FM2014016394	82	19	103	21.5	49	0.954007	Male	M4
FM2014027987	98	20	121	21.5	24	0.121409	Male	M4
FM2014033039	88	19.5	118	22.5	26	0.273205	Female	M4
FM2014038543	85	19	86	21	41	0.751805	Female	M4
FM2014015577	84	19	94	20.5	45	0.852785	Male	M4
FM2014024887	129	21.5	117	22.6	40	0.449005	Male	M4
FM2014015102	112	21.5	136	24.2	60	0.948679	Female	M4
FM2014018777	126	22.1	116	23.3	23	-0.0886937	Female	M4
FM2014046510	94	19.5	111	22.5	21	0.0156592	Male	M4
FM2014039309	90	19	108	22	47	0.850274	Male	M4
FM2014026372	113	21	130	23.2	29	0.215704	Female	M4
FM2014008184	132	22.7	125	24	55	0.752132	Female	M4
FM2014038123	90	20.2	109	22.2	39	0.663689	Male	M4
FM2014012663	160	24	178	26.5	26	-0.125353	Female	M4
FM2014043896	134	22.2	156	25	55	0.742107	Male	M4
FM2014015159	159	24	175	27	37	0.231648	Female	M4
FM2014024488	85	20.1	84	21.5	35	0.593581	Male	M4
FM2014027896	153	22.2	132	24	34	0.172735	Male	M4
FM2014027215	128	21.5	125	23	42	0.502983	Male	M4
FM2014029056	100	20.5	110	23	37	0.540804	Male	M4
FM2014043947	162	24	186	26.5	59	0.685807	Female	M4
FM2014034159	116	20.5	139	23.8	35	0.386288	Female	M4
FM2014043616	129	21	134	23.5	58	0.820568	Female	M4
FM2014034105	153	23	175	25.5	44	0.430564	Female	M4
FM2014010670	128	22	123	23	26	0.0234097	Male	M4
FM2014030968	136	21.5	177	25.6	38	0.362483	Female	M4
FM2014043622	114	21	137	24	65	1.01692	Male	M4
FM2014014979	104	21	121	23	48	0.77494	Male	M4
FM2014026249	112	21.5	129	24	63	0.997469	Female	M4
FM2014047342	173	25	165	27	42	0.302142	Male	M4
FM2014030958	115	21	121	24	23	-0.0277939	Female	M4
FM2014029096	93	20.5	111	23	25	0.197143	Male	M4
FM2014044263	101	20	113	22.3	29	0.290549	Female	M4
FM2014010696	90	20	124	23	51	0.931953	Female	M4
FM2014025542	115	21.2	126	23	48	0.707913	Male	M4
FM2014039849	100	20.5	115	23.5	50	0.84191	Female	M4
FM2014038171	99	20.5	92	21.5	32	0.402323	Male	M4
FM2014008138	117	21	131	23.4	49	0.717038	Male	M4
FM2014040112	149	22.5	140	24.5	41	0.377608	Female	M4
FM2014018026	104	20.5	119	23.2	51	0.835565	Male	M4
FM2014025931	111	21.2	124	23.5	59	0.937851	Male	M4
FM2014041117	160	23.5	138	24.7	34	0.142911	Male	M4
FM2014046880	107	20.5	85	21	26	0.142877	Female	M4
FM2014017230	91	20	120	23	24	0.170814	Female	M4
FM2014015467	90	19.5	94	21.5	46	0.828768	Male	M4
FM2014038161	91	19	82	20	21	0.0372828	Male	M4
FM2014046403	87	19	89	21	37	0.633646	Male	M4
FM2014010129	101	21	109	22	28	0.255457	Male	M4
FM2014015787	104	20.5	93	21.5	18	-0.205889	Male	M4
FM2014009097	157	24	194	28	36	0.212688	Male	M4
FM2014043831	175	24	183	26	70	0.805305	Male	M4
FM2014039722	116	21.5	148	24.7	22	-0.0780177	Male	M4
FM2014027571	87	19	84	20.5	22	0.11377	Female	M4
FM2014037359	181	25	178	26.5	24	-0.287611	Female	M4
FM2014043145	164	24	184	27	46	0.42873	Male	M4
FM2014038255	87	19.4	100	21.5	28	0.354932	Male	M4
FM2014038527	86	19	83	21	62	1.15757	Male	M4
FM2014049754	132	22	157	25	63	0.887933	Male	M4
FM2014025963	88	19.5	103	22	22	0.106151	Female	M4
FM2014033733	99	20	99	22	23	0.072081	Male	M4
FM2014049815	128	22	173	26	41	0.478885	Female	M4
FM2014039910	88	19	84	20	34	0.541469	Male	M4
FM2014044355	112	20.5	116	23	37	0.465252	Male	M4
FM2014038907	117	21	126	23.5	33	0.321725	Male	M4
FM2014010308	230	26.2	277	29.8	27	-0.329549	Male	M4
FM2014035126	103	21	105	22.3	22	0.00122313	Male	M4
FM2014045976	93	20	99	21.7	19	-0.077294	Male	M4
FM2014035797	100	20.5	100	22	48	0.801088	Male	M4
FM2014013585	137	22.5	134	24	39	0.383574	Male	M4
FM2014039416	91	20	98	21.6	32	0.458496	Female	M4
FM2014046360	83	19	103	21.6	57	1.09716	Male	M4
FM2014040910	89	19.4	95	21.5	37	0.618494	Male	M4
FM2014048668	92	20	98	22	38	0.62306	Male	M4
FM2014049801	80	18.5	97	21	38	0.716235	Male	M4
FM2014015519	99	20	101	21.5	42	0.674256	Male	M4
FM2014048567	104	21	116	23.2	49	0.79556	Female	M4
FM2014007916	192	25	221	27.5	27	-0.20916	Male	M4
FM2014020932	106	21	139	24.5	25	0.109916	Male	M4
FM2014039872	171	23.6	198	27	91	1.08308	Male	M4
FM2014027004	92	19.7	86	20.8	36	0.568993	Male	M4
FM2014027466	80	18.5	96	21	47	0.928797	Male	M4
FM2014011644	92	20	99	22	22	0.0765167	Male	M4
FM2014027933	80	19	87	21.2	26	0.336745	Male	M4
FM2014019200	107	21	102	22	85	1.32743	Male	M4
FM2014014613	98	20.4	118	23	31	0.377342	Male	M4
FM2014015869	92	20	89	21	69	1.21958	Female	M4
FM2014042569	98	20	94	21.3	51	0.875181	Male	M4
FM2014027228	92	20	103	22	49	0.877295	Male	M4
FM2014044658	95	20	101	21.6	35	0.51943	Male	M4
FM2014029563	145	23.5	170	26	66	0.871832	Female	M4
FM2014022835	108	21	125	23.2	20	-0.125689	Female	M4
FM2014037260	163	24	159	26.3	56	0.629518	Male	M4
FM2014023259	131	22	145	24.5	50	0.661891	Female	M4
FM2014031732	107	20.5	125	22.6	24	0.0628346	Female	M4
FM2014014774	109	21	123	23.2	64	1.03132	Male	M4
FM2014015802	97	20	100	22	62	1.07733	Male	M4
FM2014038463	109	20	109	22.5	39	0.535996	Male	M4
FM2014018846	83	19	86	21	24	0.23216	Female	M4
FM2014026978	126	21.9	128	23.7	38	0.413398	Male	M4
FM2014015399	82	19	69	19.5	34	0.588548	Female	M4
FM2014048494	86	19	98	22.2	42	0.768105	Male	M4
FM2014035192	124	21.5	136	23.3	40	0.475358	Male	M4
FM2014034399	82	19.9	76	20	23	0.197681	Male	M4
FM2014014944	157	24	171	26.3	28	-0.038626	Male	M4
FM2014033330	121	21.5	133	24	57	0.845858	Male	M4
FM2014018748	87	19.5	107	23.5	44	0.806918	Female	M4
FM2014015526	83	19	74	19.7	40	0.742986	Male	M4
FM2014028732	146	23	140	25	58	0.738039	Male	M4
FM2014049846	90	19	101	21.5	35	0.555475	Male	M4
FM2014007730	148	23	129	23.7	42	0.406195	Male	M4
FM2014035373	81	18	95	21	36	0.653886	Male	M4
FM2014029702	107	21	128	23.7	49	0.776601	Male	M4
FM2014047628	122	22	114	23.3	24	-0.0246269	Male	M4
FM2014014168	110	21.4	137	23.5	39	0.529908	Male	M4
FM2014043424	93	19	88	21	33	0.474775	Male	M4
FM2014019741	102	20.5	109	22.5	48	0.787886	Male	M4
FM2014049740	92	20	92	22	36	0.568993	Male	M4
FM2014025138	160	23.5	182	26	28	-0.0512447	Female	M4
FM2014016705	184	25	188	27.2	46	0.352018	Male	M4
FM2014020010	114	21	116	23	87	1.30844	Male	M4
FM2014015051	131	22	173	26	51	0.681694	Male	M4
FM2014038596	132	22.4	131	24.3	31	0.178786	Female	M4
FM2014013439	97	19.5	93	21	32	0.415929	Female	M4
FM2014046113	94	20	110	22.6	47	0.821284	Female	M4
FM2014036154	94	19.5	114	22.3	29	0.338433	Male	M4
FM2014025091	87	19	89	20.7	24	0.200782	Male	M4
FM2014038441	113	21	125	24	46	0.67705	Female	M4
FM2014042814	91	20	109	22.8	34	0.519121	Male	M4
FM2014013426	268	28	303	31.1	40	-0.0384452	Male	M4
FM2014021208	137	22	148	25	28	0.0522172	Female	M4
FM2014025108	172	24	207	27.8	44	0.352527	Male	M4
FM2014008853	109	20.5	102	22.2	48	0.743636	Female	M4
FM2014030341	112	21	139	24	35	0.409682	Female	M4
FM2014010514	242	28	293	31	60	0.435053	Female	M4
FM2014026350	115	21.7	110	23.6	46	0.665353	Male	M4
FM2014042822	89	19	106	22	53	0.977868	Male	M4
FM2014034525	98	21.2	106	22.7	22	0.0343975	Female	M4
FM2014033766	89	19	76	20.3	37	0.618494	Male	M4
FM2014045238	97	20	96	21.6	36	0.533712	Female	M4
FM2014013042	87	20	86	21.7	26	0.280824	Male	M4
FM2014016239	91	20	99	22	36	0.576279	Male	M4
FM2014047601	152	22.9	145	24.6	57	0.693798	Female	M4
FM2014030952	131	22	138	24.4	29	0.117164	Male	M4
FM2014008183	184	25	202	27.7	40	0.212256	Male	M4
FM2014028848	108	21	130	24	42	0.616249	Male	M4
FM2014021270	87	19.9	112	23	35	0.578076	Female	M4
FM2014040644	160	25	203	28.3	39	0.280112	Male	M4
FM2014034809	143	23	134	24.2	31	0.125424	Male	M4
FM2014039014	236	27	229	29	56	0.382797	Female	M4
FM2014026548	131	22	124	23	23	-0.114637	Male	M4
FM2014010968	154	24	151	25	48	0.513233	Male	M4
FM2014037745	91	19.5	110	22.5	51	0.924586	Male	M4
FM2014011669	203	25	202	27.2	49	0.349683	Male	M4
FM2014029962	85	19	87	20.5	23	0.173727	Male	M4
FM2014019987	89	19.5	94	21.4	49	0.899396	Female	M4
FM2014034832	150	23.1	144	24.6	41	0.373149	Male	M4
FM2014019113	134	22.9	160	25.4	63	0.877908	Female	M4
FM2014018823	123	22.5	132	25	58	0.85232	Male	M4
FM2014023780	173	24	185	26.5	72	0.841138	Female	M4
FM2014021261	144	23	149	24.5	22	-0.222166	Male	M4
FM2014027083	84	19.4	75	19.4	36	0.629641	Male	M4
FM2014025457	97	19.5	111	22.5	38	0.587779	Female	M4
FM2014010209	130	22.5	152	24.7	54	0.743961	Male	M4
FM2014038599	103	21	100	22.5	51	0.842006	Male	M4
FM2014034975	232	27.5	279	30.5	27	-0.335321	Female	M4
FM2014011958	179	25	208	27.6	24	-0.280203	Female	M4
FM2014015106	134	22.5	158	25	56	0.760125	Male	M4
FM2014035571	127	22	120	23.3	47	0.62069	Male	M4
FM2014015421	146	22.5	165	25.8	41	0.391168	Female	M4
FM2014017250	94	20	93	21.5	38	0.608723	Male	M4
FM2014026658	114	21	124	23.5	30	0.243732	Female	M4
FM2014028784	81	18	84	20.1	35	0.625715	Male	M4
FM2014045297	141	23.5	152	25.7	51	0.632652	Female	M4
FM2014046873	181	24.5	183	26.6	38	0.171921	Male	M4
FM2014013630	194	25	225	28	27	-0.216069	Female	M4
FM2014011937	147	23.2	147	25	45	0.479707	Male	M4
FM2014011964	136	23	167	25.8	29	0.0921926	Male	M4
FM2014018908	135	22.5	122	23	36	0.313336	Male	M4
FM2014041937	161	23.5	173	26.1	53	0.582689	Male	M4
FM2014048984	114	21	125	23.7	26	0.100631	Male	M4
FM2014033750	94	19.5	116	22.5	19	-0.0844242	Male	M4
FM2014027414	87	19	82	20.5	17	-0.144059	Male	M4
FM2014040291	136	22	157	25.2	35	0.280245	Male	M4
FM2014036389	119	21	114	22.7	32	0.279654	Female	M4
FM2014008095	105	20	93	21.5	33	0.393867	Male	M4
FM2014020993	111	21.5	129	24	32	0.326049	Female	M4
FM2014011998	166	23.4	189	27	44	0.376198	Male	M4
FM2014025957	108	21.7	122	22.8	19	-0.176982	Female	M4
FM2014032856	105	20.5	113	22.5	13	-0.537691	Male	M4
FM2014016415	167	23.5	177	25.4	43	0.349204	Female	M4
FM2014049142	90	20	97	21.6	17	-0.16666	Male	M4
FM2014012738	174	25	210	28	23	-0.303876	Male	M4
FM2014032031	82	19.5	97	21.8	32	0.527923	Male	M4
FM2014011580	99	21	94	21.6	36	0.520106	Female	M4
FM2014024583	94	20.3	82	21.2	37	0.582055	Male	M4
FM2014049041	139	22.5	159	25.5	37	0.321269	Female	M4
FM2014030312	228	26.5	239	29.4	35	-0.0642157	Male	M4
FM2014036039	98	20.5	89	21.4	34	0.469716	Female	M4
FM2014046099	150	23	145	25.1	47	0.509724	Male	M4
FM2014011206	100	21	124	23.3	58	0.99033	Male	M4
FM2014013232	112	21.7	129	23.7	16	-0.373077	Female	M4
FM2014028378	102	20.5	118	23.6	35	0.472033	Male	M4
FM2014019197	97	20.3	122	22.9	37	0.561111	Male	M4
FM2014045659	103	20.5	134	23.8	33	0.406688	Female	M4
FM2014035217	95	20	108	22.3	28	0.296287	Female	M4
FM2014033203	93	19	104	21	15	-0.313683	Male	M4
FM2014034482	90	20	93	21.5	39	0.663689	Male	M4
FM2014035997	94	19.5	98	21.4	34	0.497497	Male	M4
FM2014009035	149	23	156	25.5	41	0.377608	Male	M4
FM2014041477	93	20	105	22.2	27	0.274104	Male	M4
FM2014017950	106	20.5	107	22.7	38	0.528627	Male	M4
FM2014036477	86	19.5	106	21.6	40	0.719315	Male	M4
FM2014018259	111	21	117	23.5	25	0.079189	Male	M4
FM2014009697	80	18	110	23	23	0.214143	Male	M4
FM2014042309	102	21	115	23	51	0.84851	Male	M4
FM2014032603	81	18	93	20.5	27	0.366204	Male	M4
FM2014032420	104	20.5	133	23.8	38	0.541326	Male	M4
FM2014008611	82	19.9	106	22.7	64	1.22107	Male	M4
FM2014009784	101	20	108	22	37	0.534171	Male	M4
FM2014008619	89	20	97	22	41	0.721148	Male	M4
FM2014008523	199	25.4	244	29	26	-0.270773	Female	M4
FM2014032611	110	21.5	177	25.2	51	0.798172	Male	M4
FM2014018309	87	19	99	21.3	35	0.578076	Female	M4
FM2014021731	147	22.5	153	25	48	0.544246	Female	M4
FM2014021808	133	24	138	25.5	44	0.523957	Male	M4
FM2014032458	120	20.5	162	24	24	-0.0136073	Female	M4
FM2014021768	97	20.5	104	22.1	24	0.128247	Female	M4
FM2014009259	126	22	171	25.3	56	0.801164	Female	M4
FM2014009914	154	23.5	159	26	74	0.946097	Male	M4
FM2014018495	167	23.5	179	26	40	0.276884	Male	M4
FM2014009917	104	19.5	114	22	37	0.514657	Female	M4
FM2014009874	106	21	130	23.5	40	0.57992	Female	M4
FM2014008479	253	28	260	30.5	17	-0.855713	Female	M4
FM2014018473	164	23.5	171	26	49	0.491909	Female	M4
FM2014008631	152	23.3	122	24	31	0.0847335	Male	M4
FM2014009424	129	21.5	162	25.5	62	0.887259	Female	M4
FM2014009798	87	19	95	21	31	0.456715	Male	M4
FM2014042220	83	18.5	88	20	62	1.18124	Female	M4
FM2014021795	187	25	176	27	25	-0.26853	Female	M4
FM2014008513	203	25.7	241	28.6	42	0.195532	Male	M4
FM2014008641	102	20.5	118	23	26	0.174781	Male	M4
FM2014009460	153	23	193	26.5	44	0.430564	Male	M4
FM2014021772	95	19.5	85	21	48	0.835283	Male	M4
FM2014042268	144	23.5	184	27	42	0.424461	Female	M4
FM2014018267	107	21.9	129	24	70	1.13328	Male	M4
FM2014018242	107	20.4	134	23.5	46	0.713422	Male	M4
FM2014009403	226	27	252	30	52	0.337554	Male	M4
FM2014009868	90	19.5	111	22.5	27	0.295964	Male	M4
FM2014042375	85	20	90	21.5	50	0.950256	Male	M4
FM2014042358	89	18.5	92	20.5	55	1.01491	Male	M4
FM2014009417	199	25.5	232	29	52	0.422374	Female	M4
FM2014009295	116	21.5	108	22.5	98	1.41591	Female	M4
FM2014042351	91	20	99	21.6	13	-0.44229	Male	M4
FM2014032435	118	21	143	24.3	54	0.808528	Female	M4
FM2014008454	81	19	101	21.5	45	0.87703	Male	M4
FM2014009484	108	21	118	23	41	0.592151	Male	M4
FM2014008616	181	24.5	190	26.5	45	0.340998	Male	M4
FM2014021490	90	19	94	21.6	32	0.465863	Female	M4
FM2014042331	132	22	172	25	49	0.636619	Male	M4
FM2014009688	111	20.5	136	23.4	63	1.00345	Male	M4
FM2014018236	81	19.7	101	21.6	67	1.27506	Male	M4
FM2014018289	218	26	221	28	50	0.32236	Female	M4
FM2014032594	90	19	115	22	35	0.555475	Male	M4
FM2014021700	116	21	110	23	19	-0.224621	Female	M4
FM2014032622	146	23	144	25	36	0.261115	Male	M4
FM2014021627	106	20	116	22.7	32	0.356777	Male	M4
FM2014042194	105	20.5	114	22.5	58	0.957803	Male	M4
FM2014032547	126	22	123	24	53	0.746104	Female	M4
FM2014032483	98	20	91	21.5	69	1.17746	Male	M4
FM2014009265	197	25	221	28.2	40	0.166744	Male	M4
FM2014031156	144	22.5	171	25	70	0.935286	Female	M4
FM2014048016	101	21	99	23	35	0.478601	Female	M4
FM2014012249	145	23	164	25.5	36	0.265696	Male	M4
FM2014012320	135	22.4	139	24.3	29	0.0971126	Male	M4
FM2014012300	87	19	106	21.5	35	0.578076	Male	M4
FM2014048154	156	23	192	26	27	-0.0707338	Female	M4
FM2014012404	159	23	170	25.3	31	0.0547177	Male	M4
FM2014031350	92	20	139	23.5	27	0.281311	Female	M4
FM2014048077	145	23	164	25.2	25	-0.0989467	Male	M4
FM2014022222	397	31.2	405	34	64	0.169592	Male	M4
FM2014017487	139	22.5	154	25	37	0.321269	Male	M4
FM2014022592	152	23.5	157	25	75	0.968234	Male	M4
FM2014031151	178	24	194	26	52	0.496721	Female	M4
FM2014048131	93	20	91	21.3	35	0.533615	Male	M4
FM2014022509	130	22.5	175	26	61	0.865851	Female	M4
FM2014022415	138	22	133	23.5	88	1.1925	Female	M4
FM2014048041	101	20	111	22	47	0.773401	Male	M4
FM2014048078	99	19.5	107	21.8	57	0.979638	Female	M4
FM2014048048	153	23	152	25	65	0.820762	Male	M4
FM2014013800	98	20	140	24	59	1.02089	Male	M4
FM2014022148	297	29	369	33	94	0.747473	Male	M4
FM2014022204	124	22	141	24	48	0.65768	Male	M4
FM2014022581	103	20	127	22.5	27	0.206018	Male	M4
FM2014022449	81	19.5	113	21.5	45	0.87703	Female	M4
FM2014012443	126	22.1	110	23	38	0.413398	Male	M4
FM2014021970	116	22	136	24	67	1.03563	Male	M4
FM2014013878	164	23	172	26	64	0.758972	Male	M4
FM2014022417	164	24	211	28	57	0.64314	Male	M4
FM2014012271	140	22.8	135	24	49	0.597392	Male	M4
FM2014022618	115	21.9	147	24.5	37	0.44763	Male	M4
FM2014031371	169	24	176	26	31	0.0140547	Male	M4
FM2014013809	201	27	245	30.5	37	0.0753813	Male	M4
FM2014017515	164	23.5	156	25.5	43	0.361289	Female	M4
FM2014048101	178	24.5	190	27	61	0.656351	Male	M4
FM2014017560	91	20	101	22.5	39	0.656322	Male	M4
FM2014031277	104	20.5	123	23.2	32	0.369475	Female	M4
FM2014013911	200	25	223	28	46	0.29643	Male	M4
FM2014022086	107	21	131	23.4	28	0.216985	Female	M4
FM2014031238	94	19.5	112	21.8	21	0.0156592	Female	M4
FM2014017416	90	18.5	96	22	43	0.761327	Male	M4
FM2014031296	226	26	275	30	45	0.192972	Female	M4
FM2014013949	222	27	216	29	39	0.0617767	Male	M4
FM2014022025	154	24	180	27	59	0.719569	Male	M4
FM2014022167	148	23	193	26.5	60	0.76287	Female	M4
FM2014017600	113	21.5	119	23.5	51	0.780234	Male	M4
FM2014017485	152	23	162	26	54	0.63973	Male	M4
FM2014017473	91	20	106	22.6	26	0.250857	Male	M4
FM2014013951	128	22.3	131	24	69	0.99942	Female	M4
FM2014013841	103	21.2	125	23.7	84	1.341	Female	M4
FM2014012309	113	21	144	24.5	30	0.249606	Male	M4
FM2014017446	87	19	101	22.2	30	0.423925	Male	M4
FM2014022173	100	20.8	116	22.7	41	0.643459	Female	M4
FM2014012265	101	20	94	21	30	0.32445	Female	M4
FM2014048148	109	21.5	110	23.2	25	0.0913106	Male	M4
FM2014013858	181	24.3	174	26.5	26	-0.207568	Female	M4
FM2014031215	183	25	217	27.7	84	0.957826	Female	M4
FM2014012359	126	22	143	25	29	0.143108	Male	M4
FM2014017423	89	19.7	94	21.2	31	0.441563	Female	M4
FM2014022605	98	20	121	23	38	0.580941	Male	M4
FM2014022574	147	23.5	149	25.5	49	0.564865	Female	M4
[truncated: 351 more rows]
